# Supplementary material for: Correlate tumor mutation burden with immune signatures in human cancers
Source: BMC Immunol. 2019 Jan 11;20:4. doi: 10.1186/s12865-018-0285-5 (PMC6329192; doi:10.1186/s12865-018-0285-5)
Supplement: Supplementary file 1 — Table S1. Comparison of regulatory T cell marker genes expression levels between the lower-TMB and the higher-TMB subtypes of cancers. Table S2. Comparison of immune checkpoint genes expression levels between the lower-TMB and the higher-TMB subtypes of cancers. Table S3. Comparison of immune cell infiltrate genes expression levels between the lower-TMB and the higher-TMB subtypes of cancers. Table S4. Comparison of tumor-infiltrating lymphocytes genes expression levels between the lower-TMB and the higher-TMB subtypes of cancers. Table S5. Comparison of cancer-testis antigen genes expression levels between the lower-TMB and the higher-TMB subtypes of cancers. Table S6. Comparison of HLA genes expression levels between the lower-TMB and the higher-TMB subtypes of cancers. Table S7. Comparison of cytokine and cytokine receptor genes expression levels between the lower-TMB and the higher-TMB subtypes of cancers. Table S8. Comparison of pro-inflammation genes expression levels between the lower-TMB and the higher-TMB subtypes of cancers. (XLSX 130 kb) [file 12865_2018_285_MOESM1_ESM.xlsx]

## Sheet: Table S1
Gene symbol	Gene ID	ACC	BLCA	BRCA	CESC	CHOL	COAD	DLBC	ESCA	GBM	HNSC	KICH	KIRC	KIRP	LAML	LGG	LIHC	LUAD	LUSC	OV	PAAD	PCPG	PRAD	READ	SARC	SKCM	STAD	TGCT	THCA	THYM	UCEC	UCS	UVM	Number of cancer types with the gene highly-expressed in higher-TMB cancer	Number of cancer types with the gene high-expressed in lower-TMB cancer
ADPRH	141	-1	0	0	0	0	0	-1	0	0	-1	0	-1	0	-1	0	-1	-1	0	-1	0	-1	-1	0	0	0	-1	0	-1	-1	-1	0	0	0	14
IL1R1	3554	0	0	0	0	-1	0	0	-1	0	0	0	-1	-1	0	0	-1	-1	-1	0	0	-1	0	0	0	0	-1	-1	-1	1	-1	0	-1	1	13
KSR1	8844	0	0	0	0	0	-1	-1	-1	0	0	0	0	-1	0	-1	-1	0	0	0	0	-1	-1	0	0	-1	-1	-1	0	1	-1	-1	0	1	13
SOCS2	8835	-1	0	-1	0	0	0	-1	0	0	0	0	-1	-1	0	1	-1	-1	-1	1	0	0	-1	0	0	0	-1	0	-1	-1	0	0	0	2	12
SSH1	54434	0	-1	-1	0	0	0	-1	-1	-1	0	0	0	-1	-1	0	-1	0	0	-1	0	0	0	0	0	1	-1	0	-1	1	0	0	0	2	11
NFAT5	10725	-1	-1	-1	0	0	-1	-1	0	-1	0	0	0	0	0	0	-1	-1	0	-1	0	0	0	0	0	0	0	0	-1	1	0	-1	0	1	11
JAK1	3716	0	0	-1	0	0	0	-1	0	0	-1	0	0	0	0	0	0	-1	-1	-1	0	-1	0	0	0	-1	-1	-1	0	0	-1	0	0	0	11
CHST7	56548	0	0	0	0	0	0	0	-1	0	1	0	-1	0	0	0	-1	-1	-1	1	-1	0	-1	0	1	-1	-1	0	0	-1	0	0	0	3	10
METTL7A	25840	-1	0	-1	0	0	-1	0	0	0	0	0	0	1	0	-1	0	-1	-1	0	-1	0	-1	0	0	-1	-1	0	0	1	0	0	0	2	10
ENTPD1	953	0	0	-1	0	0	0	-1	0	0	0	0	-1	0	-1	0	-1	-1	0	0	0	-1	0	0	-1	0	-1	-1	0	1	0	0	0	1	10
LY75	4065	0	0	-1	0	0	-1	0	0	0	0	0	0	-1	0	0	-1	0	-1	-1	1	0	0	0	0	0	0	-1	-1	-1	0	0	-1	1	10
ANKRD10	55608	0	0	-1	0	0	-1	-1	0	0	-1	0	0	1	0	1	0	-1	0	1	-1	0	-1	0	0	0	0	0	0	-1	0	-1	0	3	9
IKZF2	22807	-1	0	0	0	0	0	-1	0	0	0	0	-1	0	0	0	0	-1	0	-1	1	0	0	0	0	0	-1	0	-1	-1	0	0	-1	1	9
LAX1	54900	0	0	0	0	0	0	-1	0	-1	0	0	0	-1	0	0	-1	0	-1	0	0	-1	0	0	0	0	-1	0	-1	-1	1	0	0	1	9
LAYN	143903	0	-1	-1	0	0	0	0	-1	0	0	0	0	0	0	0	-1	0	-1	0	0	0	-1	0	0	0	-1	0	-1	0	-1	0	0	0	9
CSF1	1435	-1	0	-1	0	0	1	-1	-1	0	-1	0	0	0	0	0	-1	0	0	0	0	-1	0	0	1	0	-1	0	0	1	0	0	0	3	8
ACSL4	2182	-1	0	0	0	0	0	-1	0	0	0	0	0	-1	0	-1	0	0	0	0	0	0	-1	0	0	1	0	0	-1	0	-1	1	-1	2	8
CHRNA6	8973	0	0	-1	0	0	0	0	-1	0	-1	-1	0	0	0	0	-1	-1	0	0	0	0	0	0	0	0	-1	0	0	0	-1	0	0	0	8
TMPRSS6	164656	0	0	-1	0	1	-1	0	-1	0	0	0	0	1	0	1	0	-1	0	1	-1	0	-1	0	0	0	-1	0	0	0	0	0	0	4	7
CADM1	23705	0	0	-1	0	0	0	0	-1	0	0	0	0	-1	0	0	0	0	0	0	0	0	1	0	-1	0	-1	1	-1	1	-1	0	0	3	7
CHST2	9435	0	0	1	0	0	0	0	-1	0	0	0	0	-1	0	0	-1	0	-1	0	0	0	-1	0	0	0	-1	0	0	-1	1	0	0	2	7
ZBTB38	253461	0	0	-1	0	0	-1	0	0	-1	0	0	0	-1	0	0	0	0	0	0	0	0	0	0	0	1	-1	0	-1	1	-1	0	0	2	7
MAGEH1	28986	0	0	0	0	0	-1	0	-1	0	0	0	0	-1	0	-1	0	0	0	1	0	0	0	0	0	0	-1	0	0	0	-1	-1	0	1	7
NPTN	27020	0	0	-1	0	0	0	0	-1	-1	0	0	0	-1	0	-1	0	0	0	0	0	0	0	0	-1	0	-1	0	0	1	0	0	0	1	7
RRAGB	10325	0	0	-1	0	-1	-1	0	0	0	0	0	0	0	0	0	-1	-1	0	0	0	0	0	0	0	0	-1	0	0	1	-1	0	0	1	7
ADAT2	134637	0	-1	1	1	0	0	-1	1	0	0	0	-1	1	1	1	0	0	0	0	-1	0	-1	1	0	0	1	0	0	0	-1	0	0	8	6
LIMA1	51474	-1	0	-1	0	0	1	0	0	0	0	0	0	-1	1	1	-1	-1	-1	0	0	0	0	0	1	0	1	0	0	1	0	0	0	6	6
ICOS	29851	0	0	1	1	0	1	0	-1	0	-1	0	-1	-1	1	0	0	0	0	0	0	0	0	0	0	0	0	0	-1	-1	1	0	0	5	6
IL21R	50615	0	0	1	1	0	1	0	0	0	-1	0	0	-1	0	0	-1	0	0	0	0	-1	0	0	0	0	0	0	-1	-1	1	0	0	4	6
THADA	63892	0	0	0	0	0	-1	0	0	0	0	0	0	0	1	1	0	-1	0	-1	0	0	0	0	0	0	-1	0	0	0	-1	-1	0	2	6
CSF2RB	1439	-1	0	0	0	0	0	0	0	0	-1	0	0	0	0	0	-1	0	0	0	0	0	0	0	0	0	-1	-1	-1	0	0	0	0	0	6
SSTR3	6753	0	0	0	0	-1	0	0	-1	0	-1	0	0	0	0	0	0	0	0	0	0	0	0	0	0	0	-1	0	0	-1	0	-1	0	0	6
LAPTM4B	55353	0	0	1	0	0	-1	0	-1	0	0	0	0	0	0	1	0	1	0	0	0	0	-1	0	0	-1	0	1	0	1	-1	0	0	5	5
NDFIP2	54602	0	0	0	1	0	-1	-1	0	0	0	0	0	1	0	-1	-1	0	-1	0	1	0	0	0	0	0	1	0	0	1	0	0	0	5	5
GCNT1	2650	0	0	1	-1	0	0	0	1	0	0	0	0	-1	-1	0	0	0	0	0	0	0	0	0	1	0	0	0	0	1	-1	0	-1	4	5
HS3ST3B1	9953	0	0	0	0	0	1	-1	-1	0	0	0	0	-1	0	1	0	0	0	0	0	0	0	0	0	0	-1	0	-1	1	0	0	0	3	5
IL1R2	7850	0	0	1	0	0	1	0	0	0	0	0	0	-1	0	0	0	0	0	-1	0	0	-1	0	0	0	1	0	-1	0	-1	0	0	3	5
VDR	7421	0	0	-1	0	0	0	0	0	0	-1	0	0	0	0	0	-1	-1	0	0	0	0	0	0	0	0	0	-1	0	1	0	0	0	1	5
CTLA4	1493	0	1	1	1	0	1	0	0	0	-1	0	-1	0	1	0	0	0	0	0	0	0	0	0	0	1	0	-1	-1	0	1	0	0	7	4
CASP1	834	-1	0	0	1	0	1	0	0	0	0	0	0	0	0	0	0	-1	0	0	0	-1	-1	0	0	0	1	0	0	1	0	0	0	4	4
TMEM184C	55751	0	0	-1	0	0	0	-1	0	0	0	0	0	-1	0	0	-1	0	0	0	1	0	1	0	0	0	1	0	0	1	0	0	0	4	4
CTSC	1075	-1	0	1	0	0	1	-1	-1	0	0	0	0	1	0	0	0	0	0	0	0	0	0	0	0	0	0	-1	0	0	0	0	0	3	4
HSDL2	84263	0	0	-1	0	0	-1	0	0	0	0	0	0	0	0	-1	0	0	0	0	0	-1	1	0	0	0	1	0	0	0	0	1	0	3	4
LEPROT	54741	0	0	-1	0	0	0	-1	0	0	0	0	0	0	0	0	-1	0	0	0	1	0	0	0	0	0	-1	0	0	1	0	0	0	2	4
PTPRJ	5795	0	0	0	0	0	0	-1	0	0	0	0	0	0	-1	0	0	-1	0	-1	0	0	1	0	0	0	0	0	0	1	0	0	0	2	4
CD274	29126	0	1	0	1	0	1	0	0	0	0	0	0	-1	0	0	-1	1	0	0	1	0	0	0	0	1	1	0	0	0	1	0	-1	8	3
TIGIT	201633	0	1	1	1	0	1	0	0	0	0	0	0	-1	0	0	0	0	0	0	0	0	0	0	1	0	0	-1	-1	0	1	0	0	6	3
TRAF3	7187	1	0	0	0	0	1	-1	0	0	1	0	0	-1	0	-1	0	0	0	0	0	0	0	1	1	0	0	0	0	0	0	1	0	6	3
NETO2	81831	1	1	1	0	0	0	-1	0	0	0	0	0	-1	0	0	0	1	0	0	0	0	1	0	0	-1	0	0	0	0	0	0	0	5	3
SLC35F2	54733	1	0	0	0	0	0	-1	1	0	0	0	0	-1	0	0	-1	0	0	0	0	0	1	0	0	0	1	0	0	1	0	0	0	5	3
ACP5	54	0	1	-1	1	0	0	0	0	0	0	0	0	1	0	1	-1	0	0	0	0	0	-1	0	0	0	0	0	0	0	0	0	0	4	3
AHCYL1	10768	0	0	-1	0	0	0	-1	0	0	0	0	0	0	0	-1	0	0	0	0	0	0	0	0	0	1	0	0	0	1	1	0	0	3	3
RNF145	153830	0	-1	0	0	0	1	-1	0	0	0	0	0	0	0	0	0	-1	0	0	0	0	0	0	0	1	1	0	0	0	0	0	0	3	3
BCL2L1	598	0	1	0	0	0	-1	0	1	0	0	0	0	0	0	0	0	0	0	0	0	0	0	-1	0	0	0	0	0	-1	0	0	0	2	3
TNFRSF4	7293	0	0	1	0	0	0	0	0	0	-1	0	0	0	0	0	0	0	0	0	-1	0	-1	0	0	0	0	0	0	0	0	0	0	1	3
NFE2L3	9603	0	1	1	0	0	-1	0	0	0	0	0	0	0	1	0	0	0	0	0	1	0	1	0	0	0	1	0	0	0	-1	0	0	6	2
CCR8	1237	0	1	1	1	0	0	-1	0	0	0	0	0	0	0	0	-1	0	0	0	0	0	1	0	0	0	0	0	0	0	1	0	0	5	2
HTATIP2	10553	0	0	1	0	0	-1	1	0	0	0	0	0	1	0	0	0	1	0	0	0	0	-1	0	0	0	0	0	0	0	0	0	0	4	2
TNFRSF18	8784	0	0	0	0	0	1	1	-1	0	1	0	0	0	0	0	0	0	0	0	0	0	-1	0	0	0	1	0	0	0	0	0	0	4	2
FKBP1A	2280	0	0	1	0	0	0	0	0	0	-1	0	0	0	0	0	0	1	0	1	0	0	0	0	0	0	0	0	0	0	-1	0	0	3	2
LTA	4049	0	0	0	1	0	0	0	0	0	-1	0	0	0	0	1	0	0	0	0	0	0	0	0	0	0	0	0	0	-1	1	0	0	3	2
BATF	10538	0	0	-1	1	0	0	0	0	0	0	0	0	0	0	0	0	0	0	0	0	0	-1	0	0	0	0	0	0	0	0	0	0	1	2
CD177	57126	0	0	0	0	0	0	0	0	0	0	0	0	-1	0	0	0	0	0	0	0	0	-1	0	0	0	0	0	0	1	0	0	0	1	2
TFRC	7037	1	1	1	0	0	1	0	0	0	1	0	0	-1	0	0	0	1	0	0	1	0	0	0	1	0	1	0	0	1	0	0	0	10	1
ETV7	51513	0	0	1	1	0	1	1	1	0	0	0	0	1	0	0	0	0	0	0	0	0	0	0	0	0	1	-1	0	0	1	1	0	9	1
IL12RB2	3595	0	1	1	1	0	1	0	0	0	-1	0	0	1	0	0	0	1	0	0	0	0	0	1	0	0	0	0	0	1	0	0	0	8	1
ZNF282	8427	1	0	1	0	0	0	0	0	0	0	0	0	1	0	1	1	0	0	0	-1	0	0	0	0	0	0	0	0	1	0	0	1	7	1
ERI1	90459	0	0	0	0	0	1	0	0	0	0	0	-1	0	0	1	0	1	0	0	0	0	1	0	0	1	1	0	0	0	0	0	0	6	1
GRSF1	2926	0	0	0	0	0	1	0	0	0	1	0	0	0	0	0	0	1	0	0	0	0	1	0	0	0	1	0	0	-1	0	1	0	6	1
NAB1	4664	0	0	0	0	0	0	0	0	0	0	0	0	0	0	0	-1	1	0	0	1	0	0	0	0	0	1	0	0	1	0	0	0	4	1
Number of highly-expressed genes in higher-TMB cancer		5	10	20	14	1	19	3	5	0	5	0	0	11	6	12	1	10	0	6	9	0	10	3	7	8	17	2	0	28	11	5	1
Number of highly-expressed genes in lower-TMB cancer		11	5	24	1	3	16	25	18	5	15	1	10	26	5	9	27	19	11	9	7	10	20	1	3	6	26	11	19	14	18	6	6
Table S1. Comparisons of regulatory T cell marker genes expression levels between the lower-TMB and the higher-TMB subtypes of cancers.
Note:
"1" indicates that the gene is more highly expressed in higher-TMB cancers than in lower-TMB cancers.
"-1" indicates that the gene is more highly expressed in lower-TMB cancers than in higher-TMB cancers.
"0" indicates that the gene has no significant expression differences between higher-TMB and lower-TMB cancers.

## Sheet: Table S2
Gene symbol	Gene ID	ACC	BLCA	BRCA	CESC	CHOL	COAD	DLBC	ESCA	GBM	HNSC	KICH	KIRC	KIRP	LAML	LGG	LIHC	LUAD	LUSC	OV	PAAD	PCPG	PRAD	READ	SARC	SKCM	STAD	TGCT	THCA	THYM	UCEC	UCS	UVM	Number of cancer types with the gene highly-expressed in higher-TMB cancer	Number of cancer types with the gene high-expressed in lower-TMB cancer
C10orf54	64115	-1	0	-1	0	0	1	0	0	0	0	0	0	0	0	-1	-1	-1	0	-1	0	0	-1	0	0	0	-1	-1	-1	0	0	0	0	1	10
CD200	4345	-1	0	-1	0	-1	0	0	-1	0	-1	0	0	0	0	-1	-1	0	0	0	0	0	-1	0	0	0	-1	0	0	-1	0	0	0	0	10
CD40LG	959	-1	0	0	0	-1	0	-1	0	0	-1	0	0	0	0	0	-1	-1	0	0	0	0	0	0	0	0	-1	-1	-1	-1	0	0	0	0	10
ADORA2A	135	-1	0	0	0	0	0	0	0	0	-1	0	0	-1	0	1	-1	0	0	1	-1	0	-1	0	0	0	-1	0	0	-1	1	0	-1	3	9
TNFSF14	8740	-1	0	0	0	0	0	-1	0	0	0	0	0	0	0	0	-1	-1	0	-1	0	0	0	0	0	0	-1	-1	-1	0	0	0	-1	0	9
BTLA	151888	0	0	0	0	0	0	-1	0	0	-1	0	-1	0	0	0	-1	0	0	0	0	0	0	0	0	0	-1	-1	-1	-1	1	0	0	1	8
CD160	11126	0	0	-1	0	0	0	-1	0	0	-1	0	0	0	0	0	0	0	0	0	-1	0	-1	0	1	0	-1	0	-1	0	0	0	-1	1	8
CD28	940	0	0	0	0	-1	0	0	0	0	-1	0	-1	0	0	0	-1	0	0	0	0	0	0	0	0	0	-1	-1	-1	-1	0	0	0	0	8
CD44	960	0	-1	-1	0	0	1	0	-1	0	0	0	0	0	0	0	-1	-1	-1	0	0	0	-1	0	0	0	0	-1	0	0	0	0	0	1	8
CD48	962	-1	0	0	1	0	0	0	0	0	-1	0	-1	0	0	0	-1	0	0	0	0	0	0	0	0	0	-1	-1	-1	-1	0	0	0	1	8
CD200R1	131450	-1	0	-1	1	0	0	0	-1	0	0	0	0	0	0	0	-1	-1	0	0	0	0	1	0	0	0	-1	0	-1	0	0	0	0	2	7
NRP1	8829	0	0	-1	0	0	0	0	-1	-1	0	0	0	0	0	0	-1	0	0	0	0	0	1	0	0	0	-1	0	-1	1	0	0	-1	2	7
TMIGD2	126259	-1	0	0	1	0	0	0	0	0	0	0	0	0	0	-1	-1	0	0	0	0	0	-1	-1	0	0	0	0	-1	-1	0	0	0	1	7
VTCN1	79679	0	0	0	-1	0	1	0	0	0	1	0	-1	0	0	1	-1	0	-1	0	0	0	-1	0	0	0	-1	0	0	0	-1	0	0	3	7
ICOS	29851	0	0	1	1	0	1	0	-1	0	-1	0	-1	-1	1	0	0	0	0	0	0	0	0	0	0	0	0	0	-1	-1	1	0	0	5	6
TNFSF15	9966	0	0	0	-1	0	0	0	0	-1	0	0	-1	-1	0	0	-1	-1	0	0	1	0	0	0	0	0	0	0	0	0	0	0	0	1	6
CD40	958	0	-1	0	0	0	0	0	-1	0	0	0	0	0	0	0	0	0	0	0	0	0	-1	0	0	0	-1	0	0	1	0	0	-1	1	5
HHLA2	11148	0	0	0	0	0	-1	0	1	0	1	0	0	1	0	0	0	-1	0	0	0	0	1	0	0	0	0	0	-1	-1	-1	0	0	4	5
IDO2	169355	0	0	0	0	0	0	0	0	0	-1	0	0	0	0	0	0	-1	0	0	0	0	0	0	0	0	-1	0	-1	-1	1	0	0	1	5
PDCD1LG2	80380	0	1	1	0	0	1	0	0	0	-1	0	0	-1	0	0	-1	1	0	0	1	0	0	0	0	0	0	-1	0	-1	1	0	0	6	5
TNFRSF14	8764	0	0	-1	0	0	1	1	1	0	-1	0	0	1	0	0	0	-1	0	0	0	0	-1	0	0	0	1	0	0	-1	0	0	0	5	5
TNFRSF25	8718	0	0	0	1	0	0	0	0	0	0	0	0	1	0	0	0	1	0	-1	-1	0	-1	1	0	0	0	-1	0	0	0	0	-1	4	5
BTNL2	56244	0	0	0	1	0	0	0	-1	0	0	0	0	0	0	0	0	0	0	0	0	0	-1	0	-1	0	0	0	0	1	-1	0	0	2	4
CD27	939	-1	0	0	1	0	0	0	0	0	0	0	0	-1	0	0	0	0	0	0	0	0	0	0	0	0	-1	0	0	-1	1	0	0	2	4
CD86	942	-1	0	0	1	0	1	0	0	0	0	0	0	0	0	0	-1	0	0	0	0	0	0	0	0	0	0	-1	-1	1	0	0	0	3	4
CTLA4	1493	0	1	1	1	0	1	0	0	0	-1	0	-1	0	1	0	0	0	0	0	0	0	0	0	0	1	0	-1	-1	0	1	0	0	7	4
LAIR1	3903	-1	0	0	1	0	0	0	0	0	0	0	0	0	0	0	-1	0	0	0	0	0	0	0	0	0	0	0	-1	-1	0	0	0	1	4
LGALS9	3965	-1	0	0	0	0	0	1	1	0	0	0	0	0	0	0	0	-1	0	0	0	0	0	0	0	0	1	-1	0	-1	0	0	0	3	4
CD244	51744	-1	1	0	1	0	1	0	0	0	0	0	0	0	0	0	0	0	0	0	0	0	0	0	0	0	0	0	-1	-1	0	0	0	3	3
CD274	29126	0	1	0	1	0	1	0	0	0	0	0	0	-1	0	0	-1	1	0	0	1	0	0	0	0	1	1	0	0	0	1	0	-1	8	3
CD276	80381	0	0	1	-1	0	1	0	-1	0	0	0	0	0	0	1	0	0	0	0	0	0	1	0	0	0	0	0	0	1	0	-1	0	5	3
CD80	941	0	1	1	1	0	1	0	0	0	0	0	0	-1	0	1	-1	0	0	0	0	0	1	0	1	0	1	0	0	0	1	0	-1	9	3
HAVCR2	84868	-1	1	0	1	0	1	0	0	0	0	0	0	0	0	0	-1	0	0	0	0	0	1	0	0	0	0	0	-1	0	0	0	0	4	3
ICOSLG	23308	-1	0	1	0	0	0	0	0	0	0	0	0	0	0	0	0	-1	0	0	0	0	0	0	0	0	0	0	-1	1	0	0	0	2	3
PDCD1	5133	0	1	1	1	0	1	0	0	0	0	0	0	0	0	0	0	1	0	0	0	0	-1	0	0	0	0	0	-1	-1	1	0	0	6	3
TIGIT	201633	0	1	1	1	0	1	0	0	0	0	0	0	-1	0	0	0	0	0	0	0	0	0	0	1	0	0	-1	-1	0	1	0	0	6	3
TNFRSF4	7293	0	0	1	0	0	0	0	0	0	-1	0	0	0	0	0	0	0	0	0	-1	0	-1	0	0	0	0	0	0	0	0	0	0	1	3
TNFSF18	8995	-1	0	0	0	0	0	0	0	0	1	0	0	0	0	0	-1	0	0	0	0	0	1	0	0	0	-1	0	0	0	0	0	0	2	3
KIR3DL1	3811	0	1	0	1	0	1	0	0	-1	0	0	0	0	0	0	0	1	0	0	0	0	0	0	0	0	1	-1	0	1	0	0	0	6	2
LAG3	3902	0	1	1	1	0	1	0	0	0	0	0	0	0	0	1	0	1	0	0	0	0	-1	1	0	1	1	0	-1	0	1	0	0	10	2
TNFRSF18	8784	0	0	0	0	0	1	1	-1	0	1	0	0	0	0	0	0	0	0	0	0	0	-1	0	0	0	1	0	0	0	0	0	0	4	2
TNFRSF8	943	0	0	0	0	0	0	0	0	0	0	0	0	0	0	0	-1	0	0	0	0	0	0	0	0	0	0	0	0	-1	0	0	0	0	2
TNFSF4	7292	1	0	0	1	0	0	0	-1	0	0	0	0	0	0	0	0	1	0	0	1	0	0	0	0	0	0	0	0	0	0	-1	0	4	2
CD70	970	0	0	1	1	0	0	0	0	0	0	0	0	0	0	0	0	0	0	0	0	0	0	0	1	-1	1	0	0	1	0	1	0	6	1
TNFRSF9	3604	1	0	1	1	0	0	-1	0	0	0	0	0	0	0	0	0	1	0	0	0	0	1	0	1	0	0	0	0	0	0	0	0	6	1
TNFSF9	8744	0	0	1	0	0	1	0	0	0	1	0	0	0	0	0	0	0	0	0	0	0	0	0	1	-1	1	0	0	1	1	1	0	8	1
IDO1	3620	0	1	1	1	0	1	0	0	0	0	0	0	0	0	0	0	0	0	0	0	0	0	0	1	1	1	0	0	0	0	0	0	7	0
Number of highly-expressed genes in higher-TMB cancer		2	11	14	22	0	20	3	3	0	5	0	0	3	2	5	0	8	0	1	4	0	8	2	7	4	10	0	0	9	13	2	0
Number of highly-expressed genes in lower-TMB cancer		16	2	7	3	3	1	5	10	3	13	0	7	8	0	3	22	11	2	3	4	0	15	1	1	2	16	14	22	18	3	2	8
Table S2. Comparisons of immune checkpoint genes expression levels between the lower-TMB and the higher-TMB subtypes of cancers.
Note:
"1" indicates that the gene is more highly expressed in higher-TMB cancers than in lower-TMB cancers.
"-1" indicates that the gene is more highly expressed in lower-TMB cancers than in higher-TMB cancers.
"0" indicates that the gene has no significant expression differences between higher-TMB and lower-TMB cancers.

## Sheet: Table S3
Gene symbol	Gene ID	ACC	BLCA	BRCA	CESC	CHOL	COAD	DLBC	ESCA	GBM	HNSC	KICH	KIRC	KIRP	LAML	LGG	LIHC	LUAD	LUSC	OV	PAAD	PCPG	PRAD	READ	SARC	SKCM	STAD	TGCT	THCA	THYM	UCEC	UCS	UVM	Number of cancer types with the gene highly-expressed in higher-TMB cancer	Number of cancer types with the gene high-expressed in lower-TMB cancer
ENG	2022	-1	-1	-1	0	0	0	0	0	-1	-1	0	0	-1	1	0	-1	-1	0	0	0	0	0	0	0	-1	-1	-1	0	1	-1	0	0	2	12
PTPRC	5788	-1	0	0	1	-1	0	-1	0	0	0	0	0	0	-1	0	-1	0	0	0	0	0	0	0	0	0	0	-1	-1	-1	0	0	-1	1	9
MS4A1	931	-1	0	-1	0	0	0	0	0	0	-1	0	-1	-1	0	0	-1	0	0	0	0	0	0	0	0	0	-1	-1	-1	0	1	0	0	1	9
CD1A	909	0	-1	0	0	0	0	0	0	0	-1	0	0	-1	0	0	-1	-1	-1	0	0	0	0	0	0	0	-1	0	0	-1	0	0	0	0	8
TPSB2	64499	-1	0	-1	0	0	0	0	0	0	0	0	-1	0	0	0	-1	-1	0	0	0	0	-1	0	-1	0	-1	0	0	0	0	0	0	0	8
PDPN	10630	0	0	0	-1	0	0	0	-1	0	-1	0	0	0	0	0	-1	0	-1	0	0	0	-1	0	0	0	0	0	0	0	-1	-1	0	0	8
CXCR5	643	0	0	-1	1	0	0	0	0	0	-1	0	-1	0	0	0	-1	0	0	0	0	0	0	0	0	0	-1	-1	-1	0	1	0	0	2	7
IL3RA	3563	-1	0	-1	0	0	-1	0	0	0	-1	0	0	0	0	0	0	-1	0	0	0	0	-1	0	0	0	-1	0	0	0	0	0	0	0	7
CSF3	1440	0	0	-1	-1	0	0	0	0	0	0	0	-1	-1	0	0	0	0	0	0	0	0	-1	0	0	0	0	-1	-1	0	0	0	0	0	7
B3GAT1	27087	0	0	0	0	0	0	0	-1	0	0	0	0	0	0	0	-1	-1	1	0	-1	1	0	0	0	-1	-1	0	0	0	0	0	0	2	6
CD247	919	-1	1	0	1	0	1	0	0	0	0	0	0	0	0	0	-1	0	0	0	0	0	-1	0	0	0	0	-1	-1	-1	1	0	0	4	6
CD8A	925	0	1	0	1	0	1	-1	0	0	0	0	0	-1	0	0	0	1	0	0	0	0	0	0	0	0	0	0	-1	-1	1	0	0	5	4
FOXP3	50943	0	0	1	0	0	0	-1	-1	0	-1	0	0	0	0	0	0	0	0	0	0	0	0	0	0	0	0	-1	0	0	1	0	0	2	4
CSF2	1437	0	0	1	-1	0	0	0	0	0	0	0	0	0	0	0	-1	-1	0	0	0	0	0	0	0	0	1	0	0	0	0	0	0	2	3
CD68	968	-1	0	1	1	0	1	0	0	0	0	0	0	1	-1	0	0	0	0	0	1	0	1	0	0	1	0	0	0	0	0	0	0	7	2
IL17A	3605	0	0	0	0	0	0	0	0	0	-1	0	0	0	0	0	0	0	0	0	1	0	0	0	0	0	0	0	0	0	1	0	0	2	1
Number of highly-expressed genes in higher-TMB cancer		0	2	3	5	0	3	0	0	0	0	0	0	1	1	0	0	1	1	0	2	1	1	0	0	1	1	0	0	1	6	0	0
Number of highly-expressed genes in lower-TMB cancer		7	2	6	3	1	1	3	3	1	8	0	4	5	2	0	10	6	2	0	1	0	5	0	1	2	7	7	6	4	2	1	1
Table S3. Comparisons of immune cell infiltrate genes expression levels between the lower-TMB and the higher-TMB subtypes of cancers.
Note:
"1" indicates that the gene is more highly expressed in higher-TMB cancers than in lower-TMB cancers.
"-1" indicates that the gene is more highly expressed in lower-TMB cancers than in higher-TMB cancers.
"0" indicates that the gene has no significant expression differences between higher-TMB and lower-TMB cancers.

## Sheet: Table S4
Gene symbol	Gene ID	ACC	BLCA	BRCA	CESC	CHOL	COAD	DLBC	ESCA	GBM	HNSC	KICH	KIRC	KIRP	LAML	LGG	LIHC	LUAD	LUSC	OV	PAAD	PCPG	PRAD	READ	SARC	SKCM	STAD	TGCT	THCA	THYM	UCEC	UCS	UVM	Number of cancer types with the gene highly-expressed in higher-TMB cancer	Number of cancer types with the gene high-expressed in lower-TMB cancer
GIMAP6	474344	-1	-1	-1	0	0	0	-1	0	-1	-1	0	-1	-1	0	0	-1	0	0	0	0	-1	0	0	0	0	-1	-1	-1	-1	0	0	-1	0	15
CFH	3075	-1	-1	-1	0	0	0	0	-1	-1	-1	0	0	0	0	1	0	-1	0	0	0	-1	-1	0	0	0	-1	-1	-1	1	-1	0	-1	2	14
ITGA4	3676	0	0	-1	0	-1	0	-1	-1	0	0	0	-1	-1	0	0	-1	-1	0	0	0	0	1	0	0	0	-1	-1	-1	-1	0	-1	-1	1	14
FAM65B	9750	0	0	-1	0	0	0	-1	0	0	-1	0	-1	0	0	-1	-1	-1	0	0	0	-1	0	0	0	0	-1	0	-1	-1	0	-1	-1	0	13
GVIN1	387751	-1	0	-1	1	0	0	-1	0	-1	-1	0	-1	-1	0	0	-1	0	0	0	0	0	0	0	0	0	-1	-1	-1	-1	0	0	-1	1	13
ARHGAP15	55843	-1	0	-1	0	0	0	-1	0	0	-1	0	-1	0	1	0	-1	-1	0	0	0	0	-1	0	0	0	-1	0	-1	-1	0	0	-1	1	12
ARHGAP25	9938	-1	0	-1	0	0	0	0	-1	-1	-1	0	0	0	0	0	-1	-1	0	0	0	0	0	0	0	0	-1	-1	-1	-1	0	0	-1	0	12
GIMAP4	55303	-1	0	-1	0	0	0	0	0	-1	-1	0	-1	-1	0	0	-1	0	0	0	0	-1	0	0	0	0	-1	-1	-1	0	0	0	-1	0	12
GIMAP7	168537	-1	0	-1	0	0	0	-1	0	-1	-1	0	-1	-1	0	0	-1	-1	0	0	0	0	0	0	0	0	-1	-1	0	0	0	0	-1	0	12
GPSM3	63940	-1	-1	0	0	0	0	0	0	0	-1	0	-1	0	-1	0	-1	-1	0	0	0	0	-1	0	0	-1	-1	0	-1	-1	0	0	0	0	12
IL16	3603	-1	0	-1	0	0	0	-1	-1	0	-1	0	-1	0	0	0	-1	-1	0	0	0	0	0	0	0	0	-1	-1	-1	-1	0	0	0	0	12
PIK3CD	5293	-1	0	0	0	0	1	0	-1	0	-1	0	-1	1	0	-1	-1	0	0	0	0	-1	-1	0	0	1	-1	-1	-1	-1	0	0	0	3	12
PRKCB	5579	0	0	-1	0	0	0	0	0	0	-1	0	-1	-1	0	-1	-1	0	0	0	0	0	-1	0	0	0	-1	-1	-1	-1	0	0	-1	0	12
SELL	6402	-1	0	0	0	0	0	-1	0	0	-1	0	-1	-1	0	-1	-1	-1	0	0	0	0	0	0	0	0	-1	-1	-1	-1	0	0	0	0	12
GIMAP5	55340	-1	0	0	1	0	0	0	0	-1	-1	0	-1	-1	0	0	-1	0	0	0	0	0	-1	0	0	0	-1	-1	-1	0	0	0	-1	1	11
INPP5D	3635	-1	-1	-1	1	0	0	0	0	0	-1	0	-1	0	0	0	-1	-1	0	0	0	0	-1	0	0	0	0	0	-1	-1	0	0	-1	1	11
NLRC3	197358	-1	0	-1	1	0	1	-1	0	-1	0	0	-1	0	0	0	-1	0	0	0	0	0	0	1	0	0	-1	-1	-1	-1	0	0	-1	3	11
PRKCQ	5588	1	0	0	0	0	0	0	-1	0	-1	-1	0	0	0	-1	-1	-1	0	0	0	0	-1	0	0	0	-1	0	0	-1	-1	-1	0	1	11
TRAT1	50852	-1	0	0	1	0	0	-1	0	0	-1	0	-1	-1	0	0	-1	0	0	0	0	0	0	0	0	0	-1	-1	-1	-1	1	0	-1	2	11
ARHGAP30	257106	-1	1	0	1	0	1	-1	-1	0	0	0	0	0	-1	0	-1	-1	0	0	0	0	0	0	0	0	-1	-1	-1	-1	0	0	0	3	10
DOCK11	139818	-1	0	0	0	0	0	-1	-1	0	-1	0	0	1	0	1	-1	0	-1	0	0	0	0	0	0	0	-1	-1	0	-1	-1	0	0	2	10
FYB	2533	-1	0	0	0	0	0	-1	-1	0	-1	0	0	-1	0	0	-1	0	0	0	0	0	1	0	0	0	-1	-1	-1	-1	0	0	0	1	10
IKZF1	10320	-1	0	0	1	0	0	-1	-1	0	-1	0	-1	0	0	0	-1	0	0	0	0	0	0	0	0	0	-1	-1	-1	-1	0	0	0	1	10
IL7R	3575	0	0	-1	0	0	0	-1	0	0	0	0	-1	-1	0	0	-1	0	-1	0	0	0	0	0	0	0	-1	-1	-1	-1	0	0	0	0	10
P2RY8	286530	0	0	-1	0	0	0	0	0	-1	-1	0	-1	-1	0	0	-1	0	0	0	0	0	0	0	0	0	-1	-1	-1	-1	1	0	0	1	10
PARVG	64098	-1	0	0	0	0	1	0	0	0	-1	0	0	0	0	0	-1	-1	0	0	0	-1	-1	0	0	0	-1	-1	-1	-1	1	0	0	2	10
PVRIG	79037	0	0	-1	1	0	0	0	-1	0	-1	0	0	1	0	0	-1	0	0	0	-1	0	-1	1	0	0	-1	0	-1	-1	0	0	-1	3	10
TRAF3IP3	80342	-1	0	0	1	0	0	0	-1	0	-1	0	0	0	0	0	-1	-1	0	0	0	0	0	0	0	0	-1	-1	-1	-1	1	0	-1	2	10
CCR7	1236	0	0	0	0	0	0	0	0	0	-1	0	-1	-1	0	0	-1	-1	0	0	0	0	0	0	0	0	-1	-1	-1	-1	1	0	0	1	9
EVI2B	2124	-1	0	-1	1	0	0	0	0	0	0	0	0	0	0	0	-1	-1	0	0	0	0	0	0	0	0	-1	-1	-1	-1	0	0	-1	1	9
GPR18	2841	-1	0	-1	1	0	0	0	0	0	-1	0	-1	0	0	0	-1	0	0	0	0	0	0	0	0	0	-1	-1	-1	-1	0	0	0	1	9
ITK	3702	-1	0	0	0	0	0	-1	0	0	-1	0	0	-1	0	0	-1	0	0	0	0	0	0	0	0	1	0	-1	-1	-1	1	0	-1	2	9
ITM2C	81618	1	0	1	-1	0	0	-1	0	0	0	0	-1	-1	0	0	-1	0	0	0	0	0	-1	0	-1	-1	0	0	-1	0	0	0	0	2	9
LAX1	54900	0	0	0	0	0	0	-1	0	-1	0	0	0	-1	0	0	-1	0	-1	0	0	-1	0	0	0	0	-1	0	-1	-1	1	0	0	1	9
MPEG1	219972	-1	0	-1	0	0	0	-1	0	0	-1	0	0	0	0	0	-1	0	0	0	0	0	1	0	0	0	-1	-1	-1	-1	0	0	0	1	9
MS4A1	931	-1	0	-1	0	0	0	0	0	0	-1	0	-1	-1	0	0	-1	0	0	0	0	0	0	0	0	0	-1	-1	-1	0	1	0	0	1	9
PTPRC	5788	-1	0	0	1	-1	0	-1	0	0	0	0	0	0	-1	0	-1	0	0	0	0	0	0	0	0	0	0	-1	-1	-1	0	0	-1	1	9
SELPLG	6404	-1	0	0	0	0	1	0	0	0	-1	0	0	0	-1	-1	-1	-1	0	0	0	0	0	0	0	0	-1	-1	0	-1	0	0	0	1	9
2017-09-06	23157	0	0	0	0	0	0	-1	-1	0	-1	0	-1	-1	0	0	0	0	0	0	0	0	0	0	-1	0	-1	0	-1	-1	0	0	0	0	9
SLAMF6	114836	-1	0	0	1	0	0	-1	0	0	0	0	-1	-1	0	0	-1	0	0	0	0	0	0	0	0	0	-1	-1	-1	-1	1	0	0	2	9
STAT4	6775	-1	0	0	0	0	1	-1	0	0	0	0	-1	-1	0	0	-1	0	0	0	0	0	-1	0	0	0	-1	0	-1	0	0	0	-1	1	9
CD28	940	0	0	0	0	-1	0	0	0	0	-1	0	-1	0	0	0	-1	0	0	0	0	0	0	0	0	0	-1	-1	-1	-1	0	0	0	0	8
CD48	962	-1	0	0	1	0	0	0	0	0	-1	0	-1	0	0	0	-1	0	0	0	0	0	0	0	0	0	-1	-1	-1	-1	0	0	0	1	8
CORO1A	11151	-1	0	0	1	0	0	1	0	0	-1	0	0	0	0	-1	-1	0	0	0	0	0	0	0	0	0	-1	-1	-1	-1	1	0	0	3	8
DOCK2	1794	-1	0	0	1	0	0	-1	0	0	0	0	0	0	-1	0	-1	0	0	0	0	0	0	0	0	0	-1	-1	-1	-1	0	0	0	1	8
KLRD1	3824	0	1	0	1	0	1	-1	-1	0	0	-1	0	0	0	0	-1	1	0	0	0	0	-1	0	0	1	1	-1	-1	1	1	0	-1	8	8
LCP2	3937	-1	0	0	1	0	1	-1	0	0	0	0	-1	0	0	0	-1	0	0	0	0	0	0	0	0	0	0	-1	-1	-1	0	0	-1	2	8
MAL	4118	0	0	0	0	0	0	0	0	0	0	0	-1	0	0	-1	-1	0	0	0	0	0	-1	0	0	0	-1	-1	0	-1	0	-1	0	0	8
PLAC8	51316	0	0	-1	0	0	1	0	0	0	0	0	0	0	0	1	-1	-1	0	0	0	0	-1	0	0	0	1	-1	-1	-1	0	0	-1	3	8
SASH3	54440	-1	0	0	1	0	0	0	0	0	-1	0	0	0	0	0	-1	-1	0	0	0	0	0	0	0	0	-1	-1	-1	-1	0	0	0	1	8
SH2D1A	4068	-1	0	0	1	0	1	0	-1	0	-1	0	0	-1	0	0	-1	0	0	0	0	0	0	0	1	1	0	-1	-1	-1	1	0	0	5	8
STK10	6793	0	-1	-1	0	0	0	0	0	0	0	0	0	0	0	0	-1	-1	0	-1	0	0	0	0	0	0	-1	0	-1	-1	1	0	0	1	8
ACAP1	9744	-1	0	0	1	0	1	0	0	0	0	0	0	0	0	0	-1	0	0	0	0	0	-1	0	0	0	-1	-1	-1	-1	1	0	0	3	7
ARHGAP9	64333	-1	0	0	1	0	1	0	0	0	-1	0	0	0	0	0	-1	0	0	0	0	0	-1	0	0	0	-1	0	-1	-1	1	0	0	3	7
CCR2	729230	-1	0	0	1	0	0	0	0	0	-1	0	0	0	0	0	-1	0	0	0	0	-1	0	0	0	0	-1	-1	-1	0	0	0	0	1	7
CD2	914	-1	0	0	1	0	1	0	0	0	-1	0	-1	0	0	0	-1	0	0	0	0	0	0	0	0	0	0	-1	-1	-1	1	0	0	3	7
CD3E	916	-1	0	0	1	0	1	0	0	0	-1	0	0	-1	0	0	-1	0	0	0	0	0	0	0	0	0	0	-1	-1	-1	1	0	0	3	7
CD52	1043	0	0	0	1	0	0	0	0	0	-1	0	-1	0	0	0	-1	-1	0	0	0	0	0	0	0	0	-1	-1	0	-1	1	0	0	2	7
CD6	923	0	1	0	1	0	1	0	0	0	-1	0	-1	0	0	0	-1	0	0	0	0	0	0	0	0	0	-1	-1	-1	-1	1	0	0	4	7
GPR171	29909	-1	0	0	1	0	1	-1	0	0	0	0	-1	-1	0	0	-1	0	0	0	0	0	0	0	0	1	0	-1	-1	0	1	0	0	4	7
GZMK	3003	-1	0	0	0	0	1	0	0	0	0	0	-1	-1	0	0	-1	0	0	0	0	0	0	0	0	0	-1	-1	-1	0	0	0	0	1	7
HCLS1	3059	-1	0	0	0	0	0	1	0	0	0	0	-1	0	0	0	-1	0	0	0	0	0	0	0	0	0	-1	-1	-1	-1	0	0	0	1	7
IL2RG	3561	-1	0	0	1	-1	-1	0	1	0	-1	0	0	0	0	0	0	0	0	0	0	0	0	0	0	0	0	-1	-1	-1	1	0	0	3	7
IRF4	3662	0	0	0	0	0	0	-1	0	-1	0	0	0	-1	0	0	-1	0	0	0	0	0	0	0	0	-1	-1	0	0	-1	1	0	0	1	7
LAT	27040	0	0	0	0	0	0	0	0	0	-1	0	0	0	0	0	0	0	0	0	0	0	-1	0	0	0	-1	-1	-1	-1	0	0	-1	0	7
LPXN	9404	-1	0	0	0	0	0	0	0	0	-1	0	0	1	0	0	-1	-1	0	0	0	0	0	0	0	0	0	-1	-1	-1	0	0	0	1	7
MFNG	4242	-1	0	-1	0	0	0	0	0	0	0	0	0	0	0	1	-1	-1	0	0	0	0	0	0	0	0	-1	0	-1	-1	0	0	0	1	7
MS4A6A	64231	-1	0	0	0	0	0	-1	0	0	-1	0	0	0	0	0	-1	0	0	0	0	0	0	0	0	0	-1	0	-1	0	0	0	-1	0	7
NCKAP1L	3071	-1	0	0	1	0	0	0	0	0	-1	0	0	0	0	0	-1	0	0	0	0	0	0	0	0	0	-1	-1	-1	-1	0	0	0	1	7
PAX5	5079	0	0	0	0	0	0	0	0	-1	-1	0	-1	-1	0	0	-1	0	0	0	0	0	1	0	0	0	-1	0	-1	0	1	0	0	2	7
PTPRCAP	5790	0	0	0	1	0	1	1	0	0	-1	0	0	0	0	0	0	0	0	0	-1	0	-1	0	0	0	-1	-1	-1	-1	1	0	0	4	7
TARP	445347	-1	1	0	1	0	1	-1	0	0	0	0	0	-1	0	0	0	0	0	0	0	0	1	0	0	0	0	-1	-1	-1	1	0	-1	5	7
TCL1A	8115	0	0	0	0	0	0	0	0	0	-1	0	-1	0	0	0	-1	0	0	0	0	0	0	0	0	0	-1	-1	-1	-1	1	0	0	1	7
C1orf38	9473	0	0	0	0	0	0	0	0	0	-1	0	0	0	0	0	-1	0	0	0	0	0	0	0	0	0	-1	-1	-1	-1	0	0	0	0	6
CD247	919	-1	1	0	1	0	1	0	0	0	0	0	0	0	0	0	-1	0	0	0	0	0	-1	0	0	0	0	-1	-1	-1	1	0	0	4	6
CD38	952	0	1	1	1	0	0	0	-1	0	1	0	0	-1	0	0	-1	0	0	0	0	0	-1	0	0	0	0	0	-1	-1	0	0	0	4	6
CD53	963	-1	0	0	1	0	1	0	0	0	0	0	0	0	-1	0	-1	0	0	0	0	0	0	0	0	0	0	-1	-1	-1	0	0	0	2	6
CFHR1	3078	0	0	-1	0	0	0	-1	0	0	0	0	-1	0	0	0	0	0	0	0	0	0	-1	0	0	0	-1	0	0	0	-1	0	0	0	6
CSF2RB	1439	-1	0	0	0	0	0	0	0	0	-1	0	0	0	0	0	-1	0	0	0	0	0	0	0	0	0	-1	-1	-1	0	0	0	0	0	6
FCRL3	115352	-1	0	0	1	0	0	0	0	-1	-1	0	0	-1	0	0	0	0	0	0	0	0	0	0	0	0	-1	0	-1	0	1	0	0	2	6
GLYR1	84656	-1	0	-1	0	0	-1	-1	0	0	0	0	0	0	0	0	0	-1	0	0	0	0	0	0	0	0	-1	0	0	0	0	0	0	0	6
ICOS	29851	0	0	1	1	0	1	0	-1	0	-1	0	-1	-1	1	0	0	0	0	0	0	0	0	0	0	0	0	0	-1	-1	1	0	0	5	6
IFFO1	25900	0	0	0	0	0	0	0	0	0	-1	0	0	1	0	0	0	0	0	0	-1	0	-1	0	0	0	-1	0	-1	-1	0	0	0	1	6
IL10RA	3587	-1	0	0	1	0	1	-1	0	0	-1	0	0	0	0	0	-1	0	0	0	0	0	0	0	0	0	-1	0	-1	0	0	0	0	2	6
IL2RB	3560	-1	1	0	1	0	1	-1	0	0	0	0	0	-1	0	0	-1	0	0	0	0	0	0	0	0	0	0	-1	-1	0	1	0	0	4	6
KLHL6	89857	-1	0	0	1	0	0	0	0	0	-1	0	0	0	0	0	-1	0	0	0	0	0	0	0	0	0	-1	0	-1	-1	0	0	0	1	6
LCK	3932	-1	0	0	1	0	1	0	1	0	0	0	0	-1	0	0	-1	0	0	0	0	0	-1	0	0	0	0	0	-1	-1	1	0	0	4	6
LY9	4063	-1	0	0	1	0	0	0	0	0	0	0	0	0	0	0	-1	0	0	0	0	0	0	0	0	0	-1	-1	-1	-1	1	0	0	2	6
PLEK	5341	-1	0	0	1	0	1	0	-1	0	-1	0	0	0	0	0	-1	0	0	0	0	0	1	0	0	0	0	-1	-1	0	0	0	0	3	6
TBC1D10C	374403	-1	0	0	0	0	1	0	0	0	-1	0	0	0	0	0	0	-1	0	0	0	0	-1	0	0	0	0	-1	0	-1	0	0	0	1	6
CD3G	917	0	1	0	1	0	1	-1	0	0	0	0	0	-1	0	0	-1	0	0	0	0	0	0	0	0	0	0	0	-1	-1	1	0	0	4	5
CD40	958	0	-1	0	0	0	0	0	-1	0	0	0	0	0	0	0	0	0	0	0	0	0	-1	0	0	0	-1	0	0	1	0	0	-1	1	5
CD79A	973	0	0	0	0	0	0	0	0	0	0	0	0	-1	0	0	-1	0	0	0	0	0	0	0	0	0	-1	0	-1	-1	1	0	0	1	5
CYBB	1536	-1	0	0	1	0	0	0	0	0	0	0	0	0	-1	0	-1	0	0	0	0	-1	1	0	0	0	0	0	-1	1	0	0	0	3	5
FCRL5	83416	0	0	0	0	0	0	-1	0	0	0	0	0	-1	0	0	-1	1	-1	0	0	0	0	0	0	0	0	0	-1	0	1	0	0	2	5
LILRB1	10859	-1	0	0	1	0	0	0	0	0	0	0	0	0	0	0	-1	0	0	0	0	-1	0	0	0	0	0	0	-1	1	0	0	-1	2	5
PAG1	55824	-1	0	0	0	0	0	0	0	0	-1	0	-1	-1	0	0	-1	0	0	0	0	0	1	0	0	0	0	0	0	0	0	0	0	1	5
SIRPG	55423	0	0	0	1	0	1	0	0	0	-1	0	0	-1	0	0	0	0	0	0	0	0	0	0	0	0	0	-1	-1	-1	1	0	0	3	5
SLAMF1	6504	-1	0	0	0	0	0	0	0	0	0	0	0	-1	0	0	-1	0	0	0	0	0	0	0	0	0	0	0	-1	-1	1	0	0	1	5
TBX21	30009	-1	1	0	1	0	1	0	0	0	-1	0	0	0	0	1	-1	0	0	0	0	0	0	0	0	0	0	-1	-1	0	1	0	0	5	5
VAMP5	10791	0	0	1	0	0	1	0	0	0	-1	0	0	1	0	0	1	1	0	1	0	0	-1	0	0	0	-1	0	0	-1	0	0	-1	6	5
CCL5	6352	-1	1	0	1	0	1	0	0	0	0	0	-1	0	0	0	0	1	0	0	0	0	0	0	0	0	0	-1	-1	0	1	0	0	5	4
CD27	939	-1	0	0	1	0	0	0	0	0	0	0	0	-1	0	0	0	0	0	0	0	0	0	0	0	0	-1	0	0	-1	1	0	0	2	4
CD3D	915	0	0	0	1	0	1	0	0	0	-1	0	0	0	0	0	0	0	0	0	0	0	0	0	0	0	0	-1	-1	-1	1	0	0	3	4
CD86	942	-1	0	0	1	0	1	0	0	0	0	0	0	0	0	0	-1	0	0	0	0	0	0	0	0	0	0	-1	-1	1	0	0	0	3	4
CD8A	925	0	1	0	1	0	1	-1	0	0	0	0	0	-1	0	0	0	1	0	0	0	0	0	0	0	0	0	0	-1	-1	1	0	0	5	4
CLEC2D	29121	0	0	0	0	0	0	0	-1	0	0	0	-1	0	0	1	0	-1	0	0	0	0	0	0	0	0	0	0	0	-1	0	0	0	1	4
CST7	8530	-1	0	0	1	0	1	0	0	0	0	0	0	0	0	0	0	0	0	0	0	0	0	0	0	0	-1	-1	-1	0	0	0	0	2	4
HCST	10870	-1	0	0	1	0	1	0	0	0	0	0	0	0	0	0	0	0	0	0	0	0	-1	0	0	0	0	-1	0	-1	1	0	0	3	4
KLRK1	22914	0	1	0	1	0	1	0	0	0	0	0	0	0	0	0	0	0	0	0	0	0	-1	0	0	0	0	-1	-1	0	1	0	-1	4	4
NCF4	4689	-1	0	0	0	0	0	0	0	0	-1	0	0	0	0	0	0	-1	0	0	0	0	0	0	0	0	0	0	0	-1	0	0	0	0	4
SIT1	27240	0	0	0	1	0	0	0	0	0	-1	0	0	-1	0	0	0	0	0	0	0	0	0	0	0	0	0	0	-1	-1	1	0	0	2	4
XCL1	6375	-1	1	0	1	0	0	0	-1	0	1	0	0	0	1	0	1	1	0	0	0	0	0	0	1	1	0	0	-1	0	0	0	-1	8	4
XCL2	6846	-1	0	0	1	0	1	-1	-1	0	0	0	0	0	0	0	0	1	1	0	0	0	0	0	0	1	0	0	-1	0	0	0	0	5	4
DOK2	9046	-1	0	0	1	0	1	0	0	0	0	0	0	0	0	1	0	-1	0	0	0	0	0	0	0	0	0	0	0	-1	1	0	0	4	3
F5	2153	0	0	1	0	0	0	0	0	0	0	0	0	0	0	-1	0	0	0	0	0	0	1	0	0	0	-1	0	-1	0	1	0	0	3	3
MGC29506	51237	0	0	0	0	0	0	0	0	0	0	0	0	-1	0	0	-1	0	0	0	0	0	0	0	0	0	0	0	0	-1	1	0	0	1	3
TIGIT	201633	0	1	1	1	0	1	0	0	0	0	0	0	-1	0	0	0	0	0	0	0	0	0	0	1	0	0	-1	-1	0	1	0	0	6	3
TNFRSF4	7293	0	0	1	0	0	0	0	0	0	-1	0	0	0	0	0	0	0	0	0	-1	0	-1	0	0	0	0	0	0	0	0	0	0	1	3
SPNS1	83985	0	0	1	0	1	-1	1	1	0	0	0	0	0	0	1	1	0	0	1	0	0	0	0	0	0	0	0	0	-1	0	0	0	7	2
Number of highly-expressed genes in higher-TMB cancer		2	14	8	61	1	41	4	3	0	2	0	0	6	3	8	3	7	1	2	0	0	9	2	3	7	2	0	0	6	49	0	0
Number of highly-expressed genes in lower-TMB cancer		76	6	25	1	4	3	38	22	13	67	2	43	43	7	9	88	28	4	1	4	10	30	0	2	3	74	74	99	85	4	4	31
Table S4. Comparisons of tumor-infiltrating lymphocytes genes expression levels between the lower-TMB and the higher-TMB subtypes of cancers.
Note:
"1" indicates that the gene is more highly expressed in higher-TMB cancers than in lower-TMB cancers.
"-1" indicates that the gene is more highly expressed in lower-TMB cancers than in higher-TMB cancers.
"0" indicates that the gene has no significant expression differences between higher-TMB and lower-TMB cancers.

## Sheet: Table S5
Gene symbol	Gene ID	ACC	BLCA	BRCA	CESC	CHOL	COAD	DLBC	ESCA	GBM	HNSC	KICH	KIRC	KIRP	LAML	LGG	LIHC	LUAD	LUSC	OV	PAAD	PCPG	PRAD	READ	SARC	SKCM	STAD	TGCT	THCA	THYM	UCEC	UCS	UVM	Number of cancer types with the gene highly-expressed in higher-TMB cancer	Number of cancer types with the gene high-expressed in lower-TMB cancer
CEP55	55165	1	1	1	1	0	1	-1	0	0	1	1	0	0	0	1	0	1	1	0	1	0	1	1	1	1	1	0	0	-1	1	1	0	18	2
KIF2C	11004	1	1	1	1	1	1	0	0	0	0	0	0	0	0	1	1	1	1	0	1	0	1	1	1	1	1	0	0	-1	1	0	0	17	1
OIP5	11339	1	1	1	0	0	1	0	0	1	0	1	0	0	0	1	1	1	1	0	0	0	1	1	1	1	1	0	0	-1	1	0	0	16	1
TTK	7272	1	1	1	0	0	0	-1	0	0	1	1	0	-1	1	1	1	1	1	0	1	0	1	1	1	1	1	0	0	-1	0	0	0	16	3
CASC5	57082	1	1	1	0	0	1	-1	0	0	1	1	0	-1	0	1	0	1	0	0	1	0	1	1	1	1	1	0	0	-1	1	0	0	15	3
NUF2	83540	1	1	1	1	0	0	0	0	0	1	0	0	0	0	1	1	1	1	0	0	0	1	1	1	1	1	1	0	-1	0	0	0	15	1
PBK	55872	1	1	1	0	0	1	0	0	0	1	0	0	0	0	1	0	1	0	1	1	0	1	0	1	1	1	0	0	-1	1	0	0	14	1
FANCA	2175	1	1	1	0	0	1	0	0	0	0	0	0	0	0	1	1	1	0	0	0	0	1	1	1	1	1	0	0	-1	1	0	0	13	1
KIF20B	9585	1	1	1	1	0	0	-1	0	0	0	0	0	-1	0	1	0	1	1	0	1	0	1	1	1	1	1	0	0	0	0	0	-1	13	3
ATAD2	29028	1	1	1	1	0	0	0	0	0	0	0	0	-1	0	1	0	1	1	0	1	0	1	1	0	0	1	0	0	-1	1	0	0	12	2
MAGEA6	4105	1	1	1	1	0	0	0	0	0	1	0	0	0	0	1	1	1	0	0	0	1	1	0	1	1	0	0	0	0	0	0	0	12	0
MAGEA3	4102	0	1	1	1	0	0	0	0	0	1	0	-1	0	0	1	1	1	0	0	0	1	1	0	1	1	0	0	0	0	0	0	0	11	1
ZNF165	7718	-1	1	1	0	0	1	0	1	0	1	0	0	0	1	0	0	0	1	0	0	0	1	0	-1	0	1	0	0	1	0	0	0	10	2
ACTL8	81569	0	1	1	0	0	0	0	0	0	1	0	0	0	0	1	1	1	0	0	0	0	1	0	-1	0	1	0	0	0	0	1	0	9	1
GPATCH2	55105	1	0	0	0	0	-1	-1	0	0	1	0	0	-1	0	1	-1	1	1	0	1	0	1	1	0	0	0	1	0	0	0	-1	0	9	5
MAGEA1	4100	0	1	1	0	0	0	0	0	0	1	0	0	0	0	1	1	1	0	0	0	1	1	0	0	0	0	0	0	1	0	0	0	9	0
MAGEA12	4111	1	1	1	1	0	0	-1	0	0	1	0	0	0	0	0	1	1	0	0	0	0	1	0	1	0	0	0	0	0	0	0	0	9	1
MAGEA2	4101	1	1	1	0	0	0	0	0	0	1	0	0	0	0	1	1	1	0	0	0	0	1	0	1	0	0	0	0	0	0	0	0	9	0
MAGEA4	4103	0	1	1	1	0	-1	0	0	0	1	0	0	0	0	0	1	1	0	1	0	0	0	0	0	1	0	0	0	1	-1	0	0	9	2
PRAME	23532	0	1	1	0	1	0	0	-1	0	1	0	0	1	0	0	0	1	1	0	0	0	1	0	0	0	0	0	0	1	-1	0	0	9	2
CSAG1	158511	0	1	1	1	0	0	0	0	0	1	0	0	0	0	0	1	1	0	0	0	0	1	0	1	0	0	0	0	0	0	0	0	8	0
MAGEC1	9947	0	1	1	0	0	0	0	0	0	1	0	0	0	0	0	1	1	0	0	0	1	1	0	1	0	0	0	0	0	0	0	0	8	0
MAGEC2	51438	0	1	1	0	0	0	0	0	0	0	0	0	0	0	1	1	1	0	0	0	1	1	0	0	1	0	0	0	0	0	0	0	8	0
XAGE1D	9503	0	1	1	0	0	0	0	-1	0	1	0	0	0	0	0	1	1	0	0	0	0	1	0	1	1	0	0	0	-1	-1	0	0	8	3
CAGE1	285782	0	0	1	0	0	0	0	-1	0	0	0	0	0	0	1	1	1	0	1	0	-1	0	0	0	0	1	1	0	0	0	0	0	7	2
CSAG2	728461	0	1	1	1	0	0	0	0	0	1	0	0	0	0	0	1	1	0	0	0	0	0	0	0	0	1	0	0	0	0	0	0	7	0
CT45A1	541466	1	0	1	0	0	0	0	0	0	1	0	0	0	0	0	1	1	1	0	0	0	0	0	0	0	0	0	0	0	0	1	0	7	0
CT45A2	728911	0	0	1	1	0	0	0	-1	0	1	0	0	0	0	0	1	1	1	0	0	0	0	0	0	0	-1	0	0	0	0	1	0	7	2
CTAG1B	1485	0	1	1	0	0	0	0	0	0	1	0	0	0	0	0	1	1	0	0	0	1	0	0	0	1	0	0	0	0	0	0	0	7	0
CXorf61	203413	0	1	1	0	0	0	0	1	0	1	0	0	0	0	0	0	1	0	0	0	0	0	0	0	1	1	0	0	0	0	0	0	7	0
GAGE1	2543	0	1	1	0	0	0	0	0	0	1	0	0	0	0	0	1	1	0	0	0	0	0	0	1	1	0	0	0	0	0	0	0	7	0
GAGE12D	100132399	0	1	1	0	0	0	0	0	0	1	0	0	0	0	0	1	1	0	0	0	0	0	0	1	1	0	0	0	0	0	0	0	7	0
GAGE4	2576	0	1	1	0	0	0	0	0	0	1	0	0	-1	0	0	1	1	0	0	0	0	0	0	1	1	0	0	0	0	0	0	0	7	1
IMP3	55272	0	0	0	0	0	1	1	0	0	0	0	0	0	0	0	1	-1	0	1	-1	0	0	0	0	0	1	0	1	-1	1	0	0	7	3
MAGEA9B	728269	1	1	1	0	0	0	0	0	0	1	0	0	0	0	0	1	1	0	0	0	0	0	0	0	0	0	0	0	1	0	0	0	7	0
MAGEB6	158809	0	1	1	0	0	-1	0	0	0	1	0	0	-1	0	0	1	1	0	0	0	0	0	0	1	0	0	0	0	1	0	0	0	7	2
ODF2	4957	1	1	1	0	0	0	-1	0	0	0	0	-1	0	0	1	0	1	0	0	0	0	0	1	0	-1	1	0	0	-1	0	0	0	7	4
PIWIL2	55124	0	0	-1	1	0	-1	0	1	0	1	0	0	0	1	0	1	0	0	0	0	0	0	-1	0	1	0	0	0	1	0	-1	0	7	4
POTEE	445582	0	1	0	0	0	0	-1	0	0	1	0	0	0	-1	0	0	0	0	0	1	0	1	0	0	0	0	0	0	1	1	1	0	7	2
SLCO6A1	133482	0	0	1	1	0	0	0	0	0	0	0	0	0	0	0	1	1	0	0	0	0	0	0	1	1	0	0	0	1	0	0	0	7	0
SSX1	6756	0	1	1	0	0	0	0	0	0	0	0	0	0	0	0	1	1	0	0	0	0	1	0	1	0	0	0	0	1	0	0	0	7	0
SSX2	6757	1	1	1	0	0	0	0	0	0	0	0	0	0	0	0	1	1	0	0	0	0	0	0	0	1	0	-1	0	1	-1	0	0	7	2
SSX6	280657	0	1	1	1	0	0	0	0	0	1	0	0	0	0	0	1	1	0	0	1	0	0	0	0	0	0	0	0	0	-1	0	0	7	1
ARX	170302	0	1	1	-1	0	1	0	1	1	-1	0	0	-1	0	0	0	0	0	0	0	0	0	0	0	0	0	0	0	0	1	0	0	6	3
BAGE	574	0	1	1	0	0	0	0	-1	0	0	0	0	0	0	1	1	1	0	0	0	0	0	0	0	1	0	-1	0	0	0	0	0	6	2
CTAG2	30848	0	1	1	0	0	0	0	0	0	1	0	0	0	0	0	1	1	0	0	0	0	0	0	0	1	0	0	0	0	0	0	0	6	0
DDX53	168400	0	1	1	0	0	0	0	0	0	1	0	0	0	0	0	1	1	0	0	0	0	0	0	1	0	0	0	0	0	0	0	0	6	0
DSCR8	84677	0	1	0	0	0	0	0	0	0	0	0	0	0	0	0	1	1	0	0	0	0	0	1	0	1	0	0	0	1	0	0	0	6	0
GAGE12J	729396	0	0	1	0	0	0	0	0	0	1	0	0	0	0	0	1	1	0	0	0	0	0	0	1	1	0	0	0	0	0	0	0	6	0
GAGE2A	729447	0	0	1	0	0	0	0	0	0	1	0	0	0	0	0	1	1	0	0	0	0	0	0	1	1	0	0	0	0	0	0	0	6	0
GAGE8	100101629	0	0	1	0	0	0	0	0	-1	1	0	0	0	0	0	1	1	0	0	0	0	0	0	1	1	0	0	0	0	0	0	0	6	1
HORMAD1	84072	0	1	1	0	0	0	0	0	0	1	0	-1	0	0	0	0	1	-1	0	0	0	0	1	1	0	0	0	0	0	0	0	0	6	2
HORMAD2	150280	0	0	1	0	0	0	0	0	0	0	0	1	1	-1	0	0	1	0	0	0	0	0	0	0	1	0	0	1	0	0	0	0	6	1
IGSF11	152404	-1	1	1	0	0	0	0	-1	0	1	0	0	0	0	0	0	1	0	0	0	0	-1	0	0	0	-1	1	0	1	0	-1	0	6	5
KDM5B	10765	1	0	0	0	0	0	-1	0	0	1	0	0	-1	0	1	0	1	0	0	1	0	1	0	-1	0	-1	0	0	0	-1	-1	0	6	6
LEMD1	93273	0	0	1	0	0	0	0	0	0	0	0	0	0	0	1	0	-1	0	0	0	0	-1	0	-1	1	1	1	0	1	-1	0	0	6	4
MAGEA10	4109	0	1	1	1	0	0	0	0	0	1	0	0	0	0	0	1	1	0	0	0	0	0	0	0	0	0	0	0	0	0	0	0	6	0
MAGEA11	4110	0	0	1	0	0	0	0	0	0	1	0	0	0	0	0	1	1	0	0	0	0	1	0	0	0	0	0	0	0	0	1	0	6	0
MAGEA8	4107	0	0	1	0	0	0	-1	0	0	1	0	0	0	0	0	1	1	0	0	0	0	0	0	1	0	0	0	0	1	0	0	0	6	1
PAGE1	8712	0	1	1	0	0	0	0	0	0	0	0	0	0	0	0	1	1	0	0	0	0	0	0	1	0	1	0	0	0	0	0	0	6	0
PAGE5	90737	0	1	1	0	0	0	0	0	0	0	0	0	0	0	0	1	1	0	0	0	0	0	0	1	1	0	0	0	0	0	0	0	6	0
SSX4	6759	0	1	1	0	0	0	0	0	0	1	0	0	0	0	0	1	1	0	0	0	0	0	0	0	0	0	0	0	1	0	0	0	6	0
TPTE	7179	1	1	1	0	0	0	0	-1	0	0	0	0	0	0	0	0	1	1	0	0	0	1	0	0	0	0	0	0	0	0	0	0	6	1
BAGE2	85319	0	1	0	0	0	0	-1	0	0	1	0	0	-1	0	0	0	1	0	0	0	0	1	0	1	0	0	0	0	0	0	0	0	5	2
CALR3	125972	0	0	1	0	0	0	0	0	0	0	0	0	0	0	1	1	1	0	0	0	0	0	0	0	1	0	0	0	0	0	0	0	5	0
CT45A5	441521	0	0	1	0	0	0	0	0	0	1	0	0	0	0	0	1	1	0	0	0	0	0	0	0	0	-1	0	0	0	0	1	0	5	1
DCAF12	25853	0	1	0	0	0	0	-1	0	0	1	0	-1	0	0	0	-1	1	0	0	0	0	1	0	0	0	1	0	0	0	0	0	0	5	3
FAM133A	286499	0	1	0	0	0	0	0	-1	0	0	0	0	0	0	0	1	1	0	0	0	0	1	0	0	1	-1	0	0	0	-1	0	0	5	3
MAGEA5	4104	0	0	1	1	0	-1	0	-1	0	1	0	0	0	0	0	1	1	0	0	0	0	-1	0	0	0	0	0	0	0	0	0	0	5	3
MAGEB2	4113	0	1	1	0	0	0	0	0	0	1	0	0	0	0	0	1	1	0	0	0	0	0	0	0	0	0	0	0	0	0	0	0	5	0
PASD1	139135	0	0	1	0	0	0	0	-1	0	1	0	0	0	0	0	0	1	0	1	0	0	0	0	0	1	0	0	0	0	0	0	0	5	1
RQCD1	9125	1	0	1	0	0	0	-1	0	0	0	0	0	-1	0	0	-1	1	0	0	0	0	1	0	0	0	1	0	0	0	0	0	0	5	3
SAGE1	55511	0	0	0	0	0	0	0	0	0	1	0	0	0	0	0	0	1	1	0	0	0	0	0	0	1	-1	0	0	0	0	1	0	5	1
SPA17	53340	0	0	-1	0	0	0	0	1	0	0	0	0	1	0	0	1	-1	0	0	0	0	0	0	0	1	1	0	0	-1	0	0	0	5	3
SSX5	6758	0	1	0	0	0	0	0	0	0	0	0	0	-1	0	0	1	1	0	0	0	0	0	0	0	-1	1	0	0	1	0	0	0	5	2
SSX7	280658	0	1	1	0	0	0	0	0	0	0	0	0	0	0	0	0	1	0	0	0	0	0	0	0	1	0	0	0	1	-1	0	0	5	1
TEX15	56154	0	0	1	0	0	0	0	0	0	0	0	0	0	0	-1	0	1	1	0	1	0	1	0	0	-1	-1	0	0	0	0	0	0	5	3
ACRBP	84519	0	0	0	0	0	1	0	1	0	0	0	0	1	-1	0	0	0	0	0	0	0	0	0	0	0	1	-1	0	-1	0	0	0	4	3
ANKRD45	339416	-1	0	1	-1	0	1	0	0	0	0	0	0	0	0	0	0	0	0	0	0	1	-1	0	0	0	0	0	0	1	-1	0	0	4	4
CABYR	26256	0	0	-1	0	0	0	0	-1	0	1	0	0	0	1	0	0	1	0	0	0	0	-1	0	0	-1	-1	0	0	1	0	0	0	4	5
COX6B2	125965	1	-1	-1	1	0	0	0	0	0	0	0	0	1	0	0	0	0	0	0	0	0	-1	0	0	0	0	0	0	1	-1	0	0	4	4
CT45A3	441519	0	0	1	0	0	0	0	0	0	1	0	0	0	0	0	1	1	0	0	0	0	0	0	0	0	0	0	0	0	0	0	0	4	0
CXorf48	54967	-1	0	1	0	0	0	0	0	0	0	0	0	0	1	0	1	1	0	0	0	0	0	0	0	0	-1	0	0	0	0	0	0	4	2
DMRT1	1761	0	0	1	0	0	-1	1	-1	1	0	0	0	-1	0	0	0	0	0	0	0	1	0	0	0	0	0	0	0	0	0	0	0	4	3
DPPA2	151871	0	0	1	0	0	0	0	0	0	1	0	0	0	0	0	0	1	0	0	0	0	0	0	0	0	0	0	0	-1	1	0	0	4	1
FATE1	89885	0	0	1	1	0	0	0	0	0	0	0	0	0	0	0	1	1	0	0	0	0	0	0	0	0	0	0	0	-1	0	0	0	4	1
FTHL17	53940	0	1	1	1	0	0	0	0	0	0	0	0	0	0	0	0	1	0	0	0	0	0	0	0	0	0	0	0	0	-1	0	0	4	1
KIAA0100	9703	0	0	-1	0	0	0	-1	0	-1	0	0	0	0	0	0	0	0	0	0	0	0	1	1	0	0	0	0	0	1	0	0	1	4	3
LUZP4	51213	0	0	1	1	0	0	0	0	0	0	0	0	-1	0	0	0	1	0	0	0	0	0	0	0	1	0	0	0	0	0	0	0	4	1
LY6K	54742	0	0	1	0	-1	0	0	0	0	0	0	0	0	1	-1	0	1	0	0	0	0	-1	0	0	0	0	0	0	1	-1	0	-1	4	5
NR6A1	2649	0	1	-1	0	0	-1	0	0	0	1	0	0	0	0	0	0	1	0	-1	0	0	0	0	0	0	0	0	0	1	0	0	0	4	3
NXF2	56001	0	0	1	0	0	0	0	0	0	1	0	0	0	0	0	0	0	1	1	0	0	0	0	0	0	0	0	0	0	0	0	0	4	0
OTOA	146183	0	0	0	1	0	0	1	0	0	0	0	0	1	0	0	0	-1	0	0	0	0	1	0	0	-1	-1	-1	0	-1	0	0	0	4	5
PAGE2	203569	0	0	1	0	0	0	0	0	0	0	0	0	0	0	0	1	1	0	0	0	0	0	0	1	0	0	0	0	0	0	0	0	4	0
PAGE2B	389860	0	0	1	0	0	-1	0	0	0	0	0	0	0	0	0	1	1	0	0	0	0	0	0	1	0	0	0	0	0	0	0	0	4	1
PLAC1	10761	1	0	0	0	0	-1	0	0	1	0	0	0	-1	0	0	0	1	0	0	0	0	0	0	1	0	0	0	0	0	-1	0	0	4	3
SEMG1	6406	-1	0	0	0	0	1	0	1	0	0	0	0	0	0	0	-1	0	0	0	0	0	0	0	0	0	1	1	0	0	0	0	0	4	2
SPAG4	6676	0	0	0	0	0	-1	0	0	0	0	0	0	1	0	0	1	1	0	0	0	0	-1	-1	0	0	0	0	0	1	0	0	0	4	3
SPANXE	171489	0	0	1	0	0	0	0	0	0	0	0	0	0	0	0	1	1	0	0	0	0	0	0	1	0	0	0	0	0	0	0	0	4	0
SSX3	10214	0	1	1	0	0	0	0	0	0	0	0	0	0	0	0	1	0	0	0	0	0	0	0	0	0	0	0	0	1	0	0	0	4	0
TAF7L	54457	0	1	1	0	0	0	-1	-1	0	-1	0	0	1	0	0	0	1	0	0	0	0	-1	0	0	0	0	0	0	0	-1	0	0	4	5
TMEFF1	8577	0	1	1	0	0	0	0	-1	0	0	0	0	-1	0	0	0	1	0	0	0	0	0	0	0	0	-1	1	0	0	-1	0	0	4	4
TULP2	7288	0	0	0	0	0	0	0	-1	0	0	1	0	0	0	0	0	1	0	0	1	0	-1	0	0	0	-1	0	-1	1	0	0	0	4	4
XAGE5	170627	0	1	0	0	0	0	0	0	0	0	0	0	0	0	0	1	1	0	0	0	0	0	0	0	1	0	0	0	0	0	0	0	4	0
CCDC110	256309	0	0	-1	0	0	0	0	0	0	-1	0	0	0	0	-1	0	0	0	0	0	-1	1	0	-1	1	0	0	0	1	0	-1	0	3	6
CCDC62	84660	1	0	-1	0	0	0	0	0	0	-1	0	0	0	1	0	-1	0	0	0	-1	0	0	0	0	1	-1	0	0	0	0	0	0	3	5
CEP290	80184	0	0	-1	0	0	-1	-1	-1	0	0	0	0	0	0	0	-1	0	0	-1	0	0	0	0	1	1	0	0	0	1	-1	0	0	3	7
CT45A4	441520	0	0	0	0	0	0	0	0	0	0	0	0	0	0	0	1	1	1	0	0	0	0	0	0	0	0	0	0	0	0	0	0	3	0
CTCFL	140690	0	0	1	0	0	0	0	0	0	1	0	0	0	0	0	0	1	0	0	0	0	0	0	0	0	0	0	0	0	0	0	0	3	0
CTNNA2	1496	0	0	0	0	0	-1	0	0	0	-1	0	0	-1	0	0	0	0	0	0	0	1	0	0	0	0	-1	1	0	1	-1	0	0	3	5
DKKL1	27120	0	0	1	0	0	0	0	-1	0	0	0	0	0	0	0	0	0	1	0	0	0	-1	0	-1	-1	-1	0	0	1	0	0	0	3	5
FBXO39	162517	0	-1	-1	0	0	0	0	-1	0	0	0	0	-1	0	1	0	0	0	0	0	-1	-1	0	1	0	1	0	-1	0	0	0	0	3	7
LYPD6B	130576	0	0	-1	0	0	0	0	0	0	1	0	-1	-1	0	0	0	0	0	0	0	0	-1	0	0	-1	0	0	-1	1	0	0	1	3	6
MAEL	84944	0	1	0	1	0	0	0	0	0	0	0	0	0	0	0	0	1	0	0	0	0	-1	0	0	0	-1	-1	0	0	0	0	0	3	3
MAGEB1	4112	0	0	1	0	0	0	0	-1	0	0	0	0	0	0	0	1	1	0	0	0	0	0	0	0	0	0	0	0	0	0	0	0	3	1
NOL4	8715	0	0	1	-1	0	0	0	0	0	-1	0	1	0	0	0	0	0	0	1	0	0	0	0	0	0	0	0	-1	0	0	0	0	3	3
ODF4	146852	0	1	1	0	0	0	0	0	0	0	0	0	0	-1	0	0	0	0	0	0	0	0	0	1	0	0	0	0	0	0	0	0	3	1
PAGE4	9506	0	1	0	0	0	0	0	0	0	0	0	0	0	0	0	1	1	0	0	0	0	-1	0	0	0	-1	0	0	0	0	0	0	3	2
PIWIL1	9271	0	-1	0	0	0	1	0	1	0	0	0	0	0	0	-1	-1	0	0	0	0	0	0	0	-1	0	1	-1	0	0	-1	0	0	3	6
POTEH	23784	0	0	-1	0	0	0	-1	0	0	1	0	0	-1	0	0	0	1	0	0	0	0	0	0	0	0	0	0	0	1	0	0	0	3	3
RBM46	166863	0	0	1	0	0	0	0	0	0	0	0	0	0	0	0	0	0	0	0	0	0	0	0	0	1	0	0	0	1	0	-1	0	3	1
SPAG1	6674	0	0	0	0	-1	-1	-1	0	0	-1	0	0	-1	0	0	0	0	0	0	0	0	1	0	0	0	1	0	0	0	-1	1	0	3	6
SPANXN3	139067	0	0	1	0	0	0	0	0	0	-1	0	0	0	0	0	0	1	0	0	0	0	0	0	0	0	0	0	-1	0	1	0	0	3	2
SYCP1	6847	0	0	1	0	0	0	0	0	0	0	0	-1	0	0	0	0	0	0	0	0	0	1	0	0	1	0	0	0	0	0	0	0	3	1
TEKT5	146279	0	0	1	0	0	-1	1	0	0	0	0	0	0	1	0	0	-1	0	0	0	0	-1	-1	-1	0	-1	0	0	0	0	0	0	3	6
TEX14	56155	0	1	0	0	0	0	0	0	0	0	0	0	0	0	0	0	0	0	1	-1	0	-1	0	0	0	-1	-1	0	1	-1	0	0	3	5
TMEFF2	23671	0	0	0	0	0	-1	0	0	0	-1	0	0	0	1	-1	1	0	0	0	0	0	0	0	0	1	-1	0	-1	0	-1	0	0	3	6
TSSK6	83983	1	0	-1	0	-1	-1	0	0	0	0	1	0	0	0	0	0	0	0	0	-1	0	0	0	1	0	0	0	0	0	0	0	0	3	4
XAGE2	9502	1	0	1	0	0	0	0	0	0	0	0	0	0	0	0	0	0	0	0	0	0	0	0	1	0	0	0	0	0	-1	0	0	3	1
AKAP3	10566	0	-1	-1	0	0	1	-1	0	0	-1	0	0	1	0	0	0	-1	0	0	0	0	-1	0	0	0	0	0	0	0	-1	0	0	2	7
AKAP4	8852	0	0	0	0	0	0	0	1	0	0	0	0	0	0	1	0	0	0	0	0	0	0	0	0	0	0	0	0	0	0	-1	0	2	1
ARMC3	219681	0	0	-1	0	0	0	0	0	0	0	0	0	1	0	-1	0	-1	0	0	0	0	1	0	0	0	0	0	0	0	-1	0	0	2	4
BRDT	676	0	0	0	0	0	-1	0	0	0	1	0	0	0	0	0	0	1	0	0	0	0	0	0	0	0	-1	0	0	0	0	0	0	2	2
CCDC83	220047	1	0	0	0	0	0	0	0	0	0	0	-1	0	0	0	-1	0	0	0	0	0	1	0	0	0	0	0	-1	0	0	0	0	2	3
CCNA1	8900	0	0	1	-1	0	0	0	-1	0	0	0	0	0	-1	0	0	0	0	-1	0	0	-1	0	-1	0	-1	0	0	1	0	0	0	2	7
CPXCR1	53336	1	0	1	0	0	0	0	0	0	0	0	0	0	0	0	0	0	0	0	0	0	0	0	0	0	0	0	0	0	-1	0	0	2	1
CT45A6	541465	0	0	0	0	0	0	0	0	0	1	0	0	0	0	0	0	1	0	0	0	0	0	0	0	0	0	0	0	0	0	0	0	2	0
CT47A2	728090	0	0	0	0	0	0	0	0	0	0	0	0	0	0	0	0	1	0	0	0	0	0	0	1	0	0	0	0	0	0	0	0	2	0
CTAGE1	64693	0	0	-1	0	0	0	-1	0	0	0	0	0	0	0	0	-1	0	0	0	0	0	1	0	0	1	0	0	0	0	0	0	0	2	3
CTAGE5	4253	0	0	0	0	0	0	-1	0	0	0	0	0	1	0	0	0	-1	0	0	0	0	1	0	0	0	0	0	0	0	0	0	0	2	2
ELOVL4	6785	0	0	1	0	0	0	0	-1	0	-1	0	-1	-1	0	0	-1	1	0	0	0	0	0	0	0	0	-1	0	0	-1	-1	0	0	2	8
FAM46D	169966	0	0	0	0	0	-1	0	0	0	1	0	0	0	0	0	0	0	0	0	0	0	0	0	0	0	0	0	0	1	-1	0	0	2	2
GAGE13	645051	0	0	0	0	0	0	0	0	0	0	0	0	0	0	0	1	0	0	0	0	0	0	0	0	1	0	0	0	0	0	0	0	2	0
HSPB9	94086	0	1	0	0	0	-1	0	0	0	0	0	0	0	0	0	0	0	1	0	-1	0	0	0	0	0	-1	0	0	0	0	0	0	2	3
LDHC	3948	0	1	0	0	0	0	0	0	0	-1	0	0	0	0	0	0	1	0	0	0	0	0	0	0	0	0	0	0	0	0	0	0	2	1
NXF2B	728343	0	0	0	0	0	0	0	0	0	0	0	0	0	0	0	0	0	1	1	-1	0	0	0	0	0	0	0	0	0	0	0	0	2	1
POTEB	339010	0	0	0	0	0	0	0	0	0	0	0	0	0	0	0	0	0	0	1	0	0	0	0	1	0	0	0	0	0	0	0	0	2	0
PRSS50	29122	0	0	-1	0	0	-1	0	0	1	1	0	0	0	0	0	0	0	0	0	-1	0	-1	0	-1	0	-1	0	0	0	-1	0	0	2	7
ROPN1	54763	0	0	1	0	0	0	0	-1	0	-1	0	0	0	0	-1	0	0	0	0	0	0	0	0	0	0	0	0	0	1	0	0	0	2	3
SPAG6	9576	0	1	-1	0	0	0	0	-1	0	0	0	0	0	0	-1	0	-1	0	0	0	0	0	0	0	0	-1	0	0	1	-1	0	0	2	6
SPAG9	9043	0	0	0	0	0	0	-1	0	0	0	0	0	0	0	-1	0	0	0	0	0	0	1	0	0	0	-1	0	0	1	0	0	0	2	3
SPANXA2	728712	0	0	0	0	0	0	0	0	0	0	0	0	0	0	0	1	1	0	0	0	0	0	0	0	0	0	0	0	0	0	0	0	2	0
SPANXB2	100133171	0	0	0	0	0	0	0	0	0	0	0	1	0	0	0	0	0	0	0	0	0	0	0	0	1	0	0	0	-1	0	0	0	2	1
SPANXC	64663	0	0	0	1	0	0	0	0	0	0	0	0	0	0	0	1	0	0	0	0	0	0	0	0	0	-1	0	0	0	0	0	0	2	1
SPO11	23626	0	0	0	0	0	0	0	0	0	0	0	0	0	0	0	0	1	0	0	0	0	0	0	0	1	0	0	0	0	0	0	0	2	0
SYCE1	93426	0	0	-1	0	0	0	0	0	0	-1	0	0	0	0	0	0	0	1	0	-1	0	-1	0	-1	0	-1	-1	-1	1	0	0	0	2	8
TEX101	83639	0	0	1	0	0	0	0	0	0	-1	0	0	0	0	0	0	1	0	0	0	0	-1	0	0	0	0	0	0	-1	0	0	0	2	3
TFDP3	51270	0	0	0	0	0	0	0	-1	0	0	0	0	0	0	0	1	0	0	0	0	0	0	1	0	0	0	0	0	0	0	0	0	2	1
TMPRSS12	283471	0	0	1	0	0	0	0	0	0	0	0	0	0	0	0	0	0	0	0	0	0	-1	0	0	0	0	0	0	1	0	0	0	2	1
TPPP2	122664	0	0	1	0	0	0	0	0	1	0	0	0	0	0	0	0	-1	0	0	0	-1	-1	0	0	0	0	0	0	0	0	0	0	2	3
TSGA10	80705	0	0	-1	0	-1	-1	-1	0	0	0	0	0	0	0	0	-1	0	0	0	0	0	1	0	-1	0	0	0	0	1	-1	-1	0	2	8
TSPY2	64591	0	0	0	0	0	0	0	0	0	0	0	0	0	0	0	1	1	0	0	0	0	0	0	0	0	0	-1	0	0	0	0	0	2	1
ADAM2	2515	0	0	0	0	0	0	0	0	0	0	0	0	0	0	0	0	1	0	0	0	0	0	0	0	0	0	0	0	0	0	0	0	1	0
ADAM29	11086	0	0	-1	0	0	0	0	0	0	-1	0	0	0	0	0	0	0	0	0	0	0	1	0	0	0	-1	0	0	0	0	0	0	1	3
C21orf99	149992	0	0	0	0	0	0	0	0	0	0	0	0	0	0	-1	1	0	0	0	0	0	0	0	0	0	0	0	0	0	-1	0	0	1	2
CCDC36	339834	0	0	-1	0	0	0	-1	-1	0	-1	0	0	0	0	0	0	0	0	0	0	-1	-1	0	0	0	-1	-1	0	1	-1	0	0	1	9
CRISP2	7180	0	0	1	0	0	0	0	0	0	0	0	0	-1	0	0	0	-1	0	0	-1	0	-1	0	0	0	-1	0	0	0	0	0	0	1	5
CT47B1	643311	0	0	0	0	0	0	0	0	0	0	0	0	0	0	0	0	1	0	0	0	0	0	0	0	0	0	0	0	0	0	0	0	1	0
FMR1NB	158521	0	0	0	0	0	0	0	0	0	0	0	0	0	0	0	0	1	0	0	0	0	0	0	0	0	0	0	0	0	-1	0	0	1	1
GAGE12F	100008586	0	0	0	0	0	0	0	0	0	0	0	0	0	0	0	0	0	0	0	0	0	0	0	0	1	0	0	0	0	0	0	0	1	0
IL13RA2	3598	0	0	0	0	0	-1	0	0	0	0	0	0	-1	0	1	0	-1	0	0	0	0	0	0	0	0	0	0	-1	0	-1	0	0	1	5
LIPI	149998	0	0	0	0	0	0	0	-1	0	0	0	0	0	0	0	-1	0	0	0	0	0	0	0	0	0	-1	0	0	1	0	0	0	1	3
MAGEB3	4114	0	0	0	0	0	0	0	0	0	1	0	0	0	0	0	0	0	0	0	0	0	0	0	0	0	0	0	0	0	0	0	0	1	0
MAGEB4	4115	0	0	1	0	0	0	0	0	0	0	0	0	0	0	0	0	0	0	0	0	0	0	0	0	0	0	0	0	0	0	0	0	1	0
MAGEC3	139081	0	0	0	0	0	0	0	0	0	0	0	0	-1	0	-1	1	0	0	0	-1	0	0	0	0	0	-1	0	0	0	0	0	0	1	4
MORC1	27136	0	0	1	0	0	0	0	0	0	0	0	0	0	0	0	0	0	0	0	0	0	0	0	0	0	0	0	0	0	-1	0	0	1	1
ODF3	113746	0	0	0	0	0	0	0	0	0	0	0	0	0	0	-1	0	0	0	0	0	0	0	0	0	1	-1	0	0	0	0	0	0	1	2
POTEA	340441	0	0	0	0	0	0	0	0	0	0	0	0	0	0	0	0	0	1	0	0	0	0	0	0	0	0	0	0	0	0	0	0	1	0
POTEC	388468	0	0	0	0	0	0	0	0	0	0	0	0	0	0	0	1	0	0	0	0	0	0	0	0	0	0	0	0	0	0	0	0	1	0
POTEG	404785	0	0	0	0	0	0	-1	0	0	0	0	0	0	0	0	0	1	0	0	0	0	0	0	0	0	0	0	0	0	0	0	0	1	1
PRSS54	221191	0	0	1	0	0	0	0	0	0	0	0	0	0	0	-1	0	0	0	0	0	0	0	0	0	0	0	0	0	0	0	0	0	1	1
PTPN20A	653129	0	0	0	0	0	0	0	0	0	0	0	0	0	0	0	0	0	0	1	0	0	0	0	0	0	0	0	0	0	0	0	0	1	0
RGS22	26166	0	-1	-1	0	0	0	0	0	0	0	0	0	0	0	0	-1	-1	-1	0	0	0	-1	0	0	-1	-1	0	-1	1	-1	0	-1	1	11
SPACA3	124912	0	0	0	0	0	-1	0	0	-1	0	0	0	0	0	0	0	0	0	0	0	0	-1	-1	-1	0	-1	1	0	0	0	0	0	1	6
SPAG17	200162	-1	0	-1	0	0	-1	0	-1	0	0	0	0	1	0	0	0	-1	0	0	0	0	0	0	0	-1	-1	0	0	0	-1	0	0	1	8
SPAG8	26206	0	0	-1	0	0	-1	0	0	0	-1	0	0	1	0	0	0	-1	0	0	-1	0	-1	0	0	0	-1	0	0	0	-1	0	0	1	8
SPANXN2	494119	0	0	0	0	0	0	0	0	0	0	0	0	0	0	0	0	1	0	0	0	0	0	0	0	0	0	0	0	0	0	0	0	1	0
SPATA19	219938	0	0	0	0	0	0	0	0	0	0	0	0	0	0	0	0	0	0	0	0	0	-1	0	0	-1	0	1	0	0	0	0	0	1	2
SPEF2	79925	-1	0	-1	-1	0	0	0	0	0	0	0	0	0	0	-1	0	-1	0	0	0	0	0	0	0	0	0	0	0	1	-1	0	0	1	6
TDRD6	221400	0	-1	0	0	0	-1	-1	-1	0	-1	0	-1	0	0	0	0	0	0	0	0	0	0	0	0	0	-1	0	-1	1	-1	-1	0	1	10
THEG	51298	0	0	0	0	0	0	0	0	0	0	0	0	0	0	0	0	1	0	0	0	0	0	0	0	0	-1	0	0	0	0	0	0	1	1
TMEM108	66000	0	0	0	0	-1	0	0	-1	0	-1	0	0	-1	0	0	-1	-1	0	0	0	0	-1	0	0	0	-1	0	0	1	-1	-1	0	1	10
TSPY1	7258	0	0	0	0	0	0	0	0	0	0	0	0	0	0	0	1	0	0	0	0	0	0	0	0	0	0	-1	0	0	0	0	0	1	1
VENTXP1	139538	0	0	0	0	0	0	0	0	0	0	0	0	0	0	0	0	1	0	0	0	0	0	0	0	0	0	0	0	0	0	0	0	1	0
XAGE3	170626	0	0	0	0	0	0	0	0	0	0	0	1	0	0	0	0	0	0	0	0	0	0	0	0	0	0	0	0	0	-1	0	0	1	1
ZNF645	158506	0	0	0	0	0	0	0	0	0	0	0	0	0	0	0	0	0	0	0	0	0	0	0	0	0	0	0	0	1	0	0	0	1	0
C15orf60	283677	0	0	0	0	0	0	0	-1	0	0	0	0	0	0	0	0	0	0	0	0	0	-1	0	0	0	0	0	0	0	0	0	0	0	2
CCDC33	80125	0	0	0	-1	0	-1	0	0	0	0	0	0	-1	0	0	0	-1	-1	0	0	0	0	0	0	0	0	0	0	0	-1	-1	0	0	7
CT47A1	728096	0	0	0	0	0	0	0	0	0	0	0	0	0	0	0	0	0	0	0	0	0	0	0	0	0	0	0	0	0	0	0	0	0	0
CT47A10	728036	0	0	0	0	0	0	0	0	0	0	0	0	0	0	0	0	0	0	0	0	0	0	0	0	0	0	0	0	0	0	0	0	0	0
CT47A11	255313	0	0	0	0	0	0	0	0	0	0	0	0	0	0	0	0	0	0	0	0	0	0	0	0	0	0	0	0	0	0	0	0	0	0
CT47A6	728062	0	0	0	0	0	0	0	0	0	0	0	0	0	0	0	0	0	0	0	0	0	0	0	0	0	0	0	0	0	0	0	0	0	0
CT47A7	653282	0	0	0	0	0	0	0	0	0	0	0	0	0	0	0	0	0	0	0	0	0	0	0	0	0	0	0	0	0	0	0	0	0	0
CT47A9	728042	0	0	0	0	0	0	0	0	0	0	0	0	0	0	0	0	0	0	0	0	0	0	0	0	0	0	0	0	0	0	0	0	0	0
DDX43	55510	0	0	0	0	0	0	0	0	0	0	0	0	0	0	-1	0	0	0	-1	0	-1	0	0	0	0	-1	-1	-1	0	0	0	0	0	6
DNAJB8	165721	0	0	0	0	0	0	0	0	0	0	0	0	0	0	0	0	0	0	0	0	0	0	0	0	0	0	0	0	0	0	0	0	0	0
GPAT2	150763	0	0	0	0	0	0	0	0	0	-1	0	0	0	0	0	0	0	0	0	0	0	-1	0	0	0	-1	-1	0	0	0	0	0	0	4
HEMGN	55363	0	-1	-1	0	0	0	0	0	0	-1	0	0	0	0	0	-1	-1	0	0	0	0	0	0	0	0	0	0	0	-1	0	0	0	0	6
NLRP4	147945	0	0	-1	0	0	0	0	0	0	0	0	0	0	0	0	0	0	0	0	0	0	0	0	0	0	0	0	-1	0	0	0	0	0	2
ODF1	4956	0	-1	0	0	0	0	0	0	0	0	0	0	0	0	0	0	0	0	0	0	0	0	0	0	0	0	0	0	0	0	0	0	0	1
PAGE3	139793	0	0	0	0	0	0	0	0	0	0	0	0	0	0	0	0	0	0	0	0	0	0	0	0	0	0	0	0	0	0	0	0	0	0
POTED	317754	0	0	-1	0	0	0	0	0	0	0	0	0	0	0	0	0	0	0	0	0	0	0	0	0	0	0	0	0	0	0	0	0	0	1
PRM1	5619	0	0	0	0	0	0	0	0	0	0	0	0	0	0	0	0	0	0	0	0	0	0	0	0	0	0	0	0	0	0	0	0	0	0
PRM2	5620	0	0	0	0	0	0	0	0	0	0	0	0	0	0	0	0	0	0	0	0	0	0	0	0	0	0	0	0	0	-1	0	0	0	1
PRSS55	203074	0	0	0	0	0	0	0	0	0	0	0	0	0	0	0	0	0	0	0	0	0	-1	0	0	0	0	0	0	0	0	0	0	0	1
RNF17	56163	0	0	0	0	-1	0	0	-1	0	0	0	0	0	0	-1	0	0	-1	0	0	0	0	0	0	0	0	-1	0	0	0	0	0	0	5
SPANXN1	494118	0	0	0	0	0	0	0	0	0	0	0	0	0	0	0	0	0	0	0	0	0	0	0	0	0	0	0	0	0	0	0	0	0	0
SPANXN4	441525	0	0	0	0	0	0	0	0	0	0	0	0	0	0	0	0	0	0	0	0	0	0	0	0	0	0	0	0	0	0	0	0	0	0
SPANXN5	494197	0	0	0	0	0	0	0	0	0	-1	0	0	0	0	0	0	0	0	0	0	0	0	0	0	0	0	0	0	0	0	0	0	0	1
SPINLW1	57119	0	0	0	0	0	-1	0	0	0	0	-1	0	0	0	0	0	-1	0	0	0	-1	-1	0	0	0	0	0	0	0	-1	0	0	0	6
TDRD1	56165	0	0	0	0	0	0	0	0	0	0	0	0	0	0	0	0	0	0	0	0	0	0	0	0	0	0	0	-1	-1	0	-1	0	0	3
TSPY3	728137	0	0	0	0	0	0	0	0	0	0	0	0	0	0	0	0	0	0	0	0	0	0	0	0	0	0	0	0	0	0	0	0	0	0
Number of highly-expressed genes in higher-TMB cancer		28	67	102	24	2	14	4	9	6	63	6	4	13	9	26	74	111	22	11	13	9	45	15	42	51	28	10	2	50	12	9	2
Number of highly-expressed genes in lower-TMB cancer		7	8	29	6	6	28	26	31	3	23	1	9	27	5	16	15	20	4	4	11	7	35	4	13	10	44	14	14	22	46	12	3
Table S5. Comparisons of cancer-testis antigen genes expression levels between the lower-TMB and the higher-TMB subtypes of cancers.
Note:
"1" indicates that the gene is more highly expressed in higher-TMB cancers than in lower-TMB cancers.
"-1" indicates that the gene is more highly expressed in lower-TMB cancers than in higher-TMB cancers.
"0" indicates that the gene has no significant expression differences between higher-TMB and lower-TMB cancers.

## Sheet: Table S6
Gene symbol	Gene ID	ACC	BLCA	BRCA	CESC	CHOL	COAD	DLBC	ESCA	GBM	HNSC	KICH	KIRC	KIRP	LAML	LGG	LIHC	LUAD	LUSC	OV	PAAD	PCPG	PRAD	READ	SARC	SKCM	STAD	TGCT	THCA	THYM	UCEC	UCS	UVM	Number of cancer types with the gene highly-expressed in higher-TMB cancer	Number of cancer types with the gene high-expressed in lower-TMB cancer
HLA-DOA	3111	-1	0	0	1	0	0	0	0	0	0	0	0	0	0	0	-1	-1	0	0	0	-1	0	0	0	0	0	0	-1	0	0	0	0	1	5
HLA-DOB	3112	0	0	0	1	0	0	0	-1	0	0	0	0	0	0	0	0	-1	0	0	0	0	0	0	0	0	-1	0	-1	-1	0	0	0	1	5
HLA-DPB1	3115	-1	0	0	1	0	1	1	0	0	-1	0	0	0	0	0	-1	-1	0	0	0	0	-1	0	0	0	0	0	0	0	0	0	0	3	5
HLA-DQA1	3117	-1	0	0	1	0	0	0	0	0	0	0	0	0	0	1	-1	-1	0	0	0	0	0	0	0	0	0	-1	-1	0	0	0	0	2	5
HLA-DQB2	3120	-1	0	0	0	0	0	0	0	0	-1	0	0	0	0	0	-1	-1	0	0	0	0	0	0	0	0	-1	0	0	0	0	0	0	0	5
HLA-J	3137	0	0	0	0	0	0	0	0	0	0	0	0	1	0	1	0	-1	0	0	0	0	-1	0	0	0	0	-1	0	-1	0	0	-1	2	5
HLA-A	3105	-1	0	1	0	0	0	0	1	0	0	-1	0	1	0	0	0	0	0	0	-1	0	-1	0	0	1	0	0	0	0	0	0	0	4	4
HLA-DPA1	3113	-1	0	0	1	0	1	0	0	0	0	0	0	0	0	0	-1	-1	0	0	0	0	0	0	0	0	0	-1	0	0	0	0	0	2	4
HLA-DPB2	3116	0	0	0	1	0	1	0	-1	0	0	0	0	0	0	0	-1	0	0	0	0	0	0	0	0	0	0	0	-1	-1	0	0	0	2	4
HLA-DQA2	3118	-1	0	0	1	0	0	0	0	0	-1	0	0	0	0	0	-1	0	0	0	0	-1	0	0	0	0	0	0	0	0	0	0	0	1	4
HLA-DRA	3122	-1	0	0	1	0	1	0	0	0	0	0	0	0	0	0	-1	-1	0	0	0	-1	0	0	0	0	0	0	0	0	0	0	0	2	4
HLA-E	3133	-1	0	0	1	0	1	0	0	0	0	0	0	0	0	0	0	-1	0	0	0	-1	-1	0	0	0	0	0	0	0	0	0	0	2	4
HLA-H	3136	-1	0	1	0	0	0	0	0	0	0	-1	0	1	0	0	1	0	0	0	-1	0	-1	0	0	1	0	0	0	0	0	0	0	4	4
HLA-B	3106	-1	0	1	0	0	0	0	0	0	0	-1	0	1	0	0	0	0	0	0	0	0	-1	0	0	1	0	0	0	0	0	0	0	3	3
HLA-DMB	3109	0	0	0	0	0	1	0	0	0	0	0	0	0	0	0	-1	-1	0	0	0	-1	0	0	0	0	0	0	0	1	0	0	0	2	3
HLA-DQB1	3119	0	0	0	1	0	1	0	0	0	-1	0	0	0	0	0	-1	-1	0	0	0	0	0	0	0	0	0	0	0	0	0	0	0	2	3
HLA-DRB1	3123	-1	0	0	1	0	1	1	0	0	0	0	0	0	0	0	0	-1	0	0	0	0	0	0	0	0	0	-1	0	0	0	0	0	3	3
HLA-F	3134	-1	0	1	0	0	1	0	0	0	0	0	0	1	0	0	0	-1	0	0	0	0	-1	0	0	0	0	0	0	0	0	0	0	3	3
HLA-C	3107	0	1	0	0	0	1	0	0	0	0	0	0	0	0	0	0	0	0	0	-1	0	-1	0	0	1	0	0	0	0	0	0	0	3	2
HLA-DMA	3108	0	0	0	0	0	1	0	0	0	0	0	0	0	0	0	0	-1	0	0	0	-1	0	0	0	0	0	0	0	0	0	0	0	1	2
HLA-DRB5	3127	-1	0	0	0	0	1	1	0	0	0	0	0	0	0	0	0	-1	0	0	0	0	0	0	0	0	0	0	0	0	0	0	0	2	2
HLA-G	3135	0	1	1	0	0	0	0	0	0	0	0	0	0	-1	0	0	0	0	0	0	0	-1	0	0	0	0	0	0	0	0	0	0	2	2
HLA-L	3139	0	1	0	0	0	0	0	0	0	0	0	0	0	0	0	0	-1	0	0	0	0	-1	0	0	1	0	0	0	0	0	0	0	2	2
HLA-DRB6	3128	0	1	0	1	0	0	0	0	0	-1	0	0	0	0	0	0	0	0	0	0	0	0	0	0	1	0	0	0	0	0	0	0	3	1
Number of highly-expressed genes in higher-TMB cancer		0	4	5	12	0	12	3	1	0	0	0	0	5	0	2	1	0	0	0	0	0	0	0	0	6	0	0	0	1	0	0	0
Number of highly-expressed genes in lower-TMB cancer		14	0	0	0	0	0	0	2	0	5	3	0	0	1	0	10	16	0	0	3	6	10	0	0	0	2	4	4	3	0	0	1
Table S6. Comparisons of HLA genes expression levels between the lower-TMB and the higher-TMB subtypes of cancers.
Note:
"1" indicates that the gene is more highly expressed in higher-TMB cancers than in lower-TMB cancers.
"-1" indicates that the gene is more highly expressed in lower-TMB cancers than in higher-TMB cancers.
"0" indicates that the gene has no significant expression differences between higher-TMB and lower-TMB cancers.

## Sheet: Table S7
Gene symbol	Gene ID	ACC	BLCA	BRCA	CESC	CHOL	COAD	DLBC	ESCA	GBM	HNSC	KICH	KIRC	KIRP	LAML	LGG	LIHC	LUAD	LUSC	OV	PAAD	PCPG	PRAD	READ	SARC	SKCM	STAD	TGCT	THCA	THYM	UCEC	UCS	UVM	Number of cancer types with the gene highly-expressed in higher-TMB cancer	Number of cancer types with the gene high-expressed in lower-TMB cancer
TNFAIP8L3	388121	-1	0	-1	1	0	-1	0	-1	0	-1	0	-1	0	-1	-1	-1	0	0	0	0	0	-1	0	0	-1	-1	-1	-1	1	-1	0	0	2	15
CCL14	6358	-1	-1	-1	0	0	0	0	0	0	-1	0	0	0	0	0	-1	-1	0	0	0	-1	-1	-1	-1	-1	-1	-1	0	0	-1	0	0	0	14
CX3CR1	1524	-1	-1	-1	0	0	0	-1	0	0	-1	0	0	0	0	-1	-1	-1	-1	0	0	-1	0	0	0	0	-1	0	-1	1	-1	0	-1	1	14
CCL21	6366	-1	0	-1	0	0	0	0	-1	0	-1	0	-1	-1	0	0	-1	0	0	0	0	-1	-1	0	0	0	-1	-1	-1	0	-1	0	0	0	13
IL1R1	3554	0	0	0	0	-1	0	0	-1	0	0	0	-1	-1	0	0	-1	-1	-1	0	0	-1	0	0	0	0	-1	-1	-1	1	-1	0	-1	1	13
IL33	90865	-1	-1	-1	0	0	0	-1	0	0	0	0	0	-1	0	0	-1	-1	0	0	0	0	-1	0	0	-1	-1	-1	-1	0	0	0	-1	0	13
CCL19	6363	-1	0	-1	0	0	0	0	-1	0	-1	0	-1	-1	0	0	-1	-1	0	0	0	0	0	0	0	0	-1	-1	-1	-1	1	0	0	1	12
CCR6	1235	-1	-1	-1	0	0	0	-1	0	0	-1	-1	0	0	0	0	-1	-1	0	0	0	0	-1	0	0	0	-1	-1	-1	0	0	0	0	0	12
IL16	3603	-1	0	-1	0	0	0	-1	-1	0	-1	0	-1	0	0	0	-1	-1	0	0	0	0	0	0	0	0	-1	-1	-1	-1	0	0	0	0	12
IL17D	53342	0	1	-1	-1	0	0	-1	-1	0	-1	0	-1	0	0	-1	0	-1	0	0	0	0	-1	0	0	-1	-1	1	-1	1	0	0	0	3	12
TGFB2	7042	0	-1	-1	-1	0	-1	0	-1	0	-1	0	-1	-1	0	1	-1	-1	0	0	0	0	0	0	0	-1	-1	0	0	1	0	0	0	2	12
TGFBR2	7048	-1	-1	-1	0	-1	-1	-1	0	-1	0	0	0	0	0	0	-1	-1	0	0	1	-1	0	0	0	0	-1	0	-1	1	0	0	0	2	12
BMP3	651	-1	0	-1	0	0	-1	0	-1	0	0	0	0	-1	0	-1	-1	-1	0	0	0	0	0	0	-1	0	-1	0	0	0	-1	0	0	0	11
CXCL12	6387	-1	0	-1	0	-1	0	0	-1	0	-1	0	-1	0	0	0	-1	0	0	0	0	0	0	0	0	0	-1	0	-1	-1	-1	0	0	0	11
TNFSF8	944	-1	0	-1	0	-1	0	-1	0	0	-1	0	0	0	0	0	-1	0	0	0	0	0	0	0	0	0	-1	-1	-1	-1	-1	0	0	0	11
BMPR2	659	0	0	-1	0	0	-1	-1	-1	0	0	0	0	-1	0	0	-1	0	-1	0	1	0	1	0	-1	1	-1	0	-1	1	0	0	0	4	10
IL7R	3575	0	0	-1	0	0	0	-1	0	0	0	0	-1	-1	0	0	-1	0	-1	0	0	0	0	0	0	0	-1	-1	-1	-1	0	0	0	0	10
ILK	3611	0	-1	-1	-1	0	0	1	0	0	-1	0	0	0	-1	0	0	-1	-1	0	0	0	-1	0	-1	0	-1	0	0	0	0	0	0	1	10
TGFB1I1	7041	0	-1	-1	-1	0	0	0	0	0	-1	0	-1	-1	0	1	-1	0	-1	0	0	0	-1	0	0	0	-1	0	0	1	0	0	0	2	10
BMP5	653	0	-1	0	0	0	-1	0	0	0	-1	0	-1	-1	0	0	-1	-1	0	0	0	0	0	0	0	0	-1	0	-1	0	0	0	0	0	9
BMP6	654	0	-1	0	0	0	0	0	-1	0	-1	0	-1	0	0	0	0	0	0	0	0	0	1	0	-1	-1	-1	0	-1	1	-1	0	0	2	9
BMPER	168667	0	-1	-1	0	0	0	0	-1	0	0	0	0	0	0	0	-1	-1	-1	0	0	1	-1	0	0	0	-1	0	0	1	-1	0	0	2	9
CCR4	1233	-1	0	0	0	-1	0	-1	0	0	-1	0	0	-1	0	0	-1	-1	0	0	0	0	0	0	0	0	-1	0	0	-1	1	0	0	1	9
CCR7	1236	0	0	0	0	0	0	0	0	0	-1	0	-1	-1	0	0	-1	-1	0	0	0	0	0	0	0	0	-1	-1	-1	-1	1	0	0	1	9
CX3CL1	6376	0	0	0	0	0	0	0	-1	0	0	-1	0	1	0	0	-1	-1	-1	-1	0	0	-1	0	0	-1	-1	0	0	1	0	0	0	2	9
IL11RA	3590	0	0	0	0	0	-1	0	0	0	-1	0	-1	1	0	0	0	-1	0	0	-1	0	-1	0	-1	0	-1	0	0	0	-1	0	0	1	9
IL34	146433	-1	0	0	0	0	-1	1	0	0	0	0	0	0	0	0	-1	-1	0	-1	0	0	-1	0	0	-1	-1	0	0	-1	0	0	0	1	9
TGFB1	7040	0	-1	-1	0	-1	1	0	-1	0	0	0	0	-1	0	0	0	0	-1	0	0	0	-1	0	1	0	-1	0	0	-1	0	0	0	2	9
TGFB3	7043	0	0	-1	0	0	0	0	-1	0	-1	0	-1	-1	1	0	-1	0	0	0	0	0	-1	0	0	-1	-1	0	0	0	0	0	0	1	9
TGFBR3	7049	0	0	-1	-1	0	0	-1	0	0	1	0	0	0	0	-1	0	-1	0	0	0	-1	-1	0	0	0	-1	0	-1	0	0	0	0	1	9
TNFRSF19	55504	0	0	-1	-1	0	-1	-1	-1	0	-1	0	0	0	0	0	0	-1	0	0	0	0	0	0	0	0	-1	0	0	1	-1	0	0	1	9
TNFSF10	8743	0	0	0	0	0	0	0	0	0	-1	0	0	1	-1	0	0	-1	-1	0	1	-1	0	-1	0	0	0	-1	0	0	-1	0	-1	2	9
TNFSF14	8740	-1	0	0	0	0	0	-1	0	0	0	0	0	0	0	0	-1	-1	0	-1	0	0	0	0	0	0	-1	-1	-1	0	0	0	-1	0	9
BMP4	652	0	0	-1	-1	0	0	-1	1	0	0	0	0	0	0	0	0	-1	0	0	0	-1	0	0	0	-1	0	0	-1	1	-1	0	0	2	8
BMPR1B	658	0	0	-1	-1	0	0	0	-1	0	0	0	0	-1	0	-1	-1	0	0	0	1	0	1	0	0	0	-1	0	0	-1	0	0	0	2	8
CCL16	6360	-1	-1	-1	0	0	0	0	0	0	0	0	0	0	0	0	0	-1	0	0	0	0	-1	0	-1	0	-1	0	0	0	0	0	-1	0	8
CSF1	1435	-1	0	-1	0	0	1	-1	-1	0	-1	0	0	0	0	0	-1	0	0	0	0	-1	0	0	1	0	-1	0	0	1	0	0	0	3	8
CSF1R	1436	-1	0	-1	0	0	0	0	0	0	-1	0	0	0	0	-1	-1	0	0	0	0	-1	0	0	0	0	-1	0	-1	1	0	0	0	1	8
CXCL14	9547	0	-1	-1	0	0	-1	0	-1	0	0	0	0	1	0	0	-1	-1	0	0	0	0	1	0	0	-1	-1	0	0	0	0	0	0	2	8
IFNGR1	3459	0	0	0	0	0	1	0	0	0	-1	0	0	0	0	-1	-1	-1	0	0	0	-1	-1	0	0	0	1	-1	-1	1	0	0	0	3	8
IL12B	3593	0	0	0	0	0	0	0	0	0	-1	0	0	-1	0	0	-1	-1	0	0	0	0	0	0	1	0	-1	-1	-1	-1	1	0	0	2	8
IL17RE	132014	0	1	1	0	0	-1	0	1	0	0	0	0	-1	0	1	0	-1	0	-1	0	0	-1	-1	-1	0	0	0	0	-1	1	0	0	5	8
IL28RA	163702	0	0	-1	0	0	-1	0	-1	0	0	-1	0	0	0	0	0	-1	0	0	0	0	-1	0	0	0	0	0	0	1	-1	0	-1	1	8
IL4R	3566	0	0	0	1	0	0	0	0	-1	-1	0	0	0	0	0	-1	-1	0	-1	0	0	-1	0	0	0	-1	-1	0	1	0	0	0	2	8
IL5RA	3568	0	0	-1	0	0	0	0	0	0	0	0	0	0	0	0	-1	-1	-1	0	0	0	0	0	-1	0	-1	0	-1	0	-1	0	0	0	8
IL6ST	3572	0	0	-1	0	0	0	-1	0	-1	0	0	0	-1	0	0	-1	0	0	-1	0	0	1	0	0	0	-1	0	-1	1	0	0	0	2	8
TNFSF12	8742	-1	0	-1	0	0	0	0	-1	0	-1	0	0	0	0	-1	0	-1	0	0	0	0	-1	0	0	0	-1	0	0	1	0	0	0	1	8
BMP7	655	0	-1	1	0	0	0	0	-1	0	1	0	0	0	0	0	0	-1	0	0	1	0	-1	0	0	-1	-1	1	0	0	-1	0	0	4	7
BMP8A	353500	0	0	0	-1	0	-1	0	0	0	-1	0	0	0	0	-1	0	1	0	0	0	-1	0	0	0	0	0	0	0	0	0	-1	-1	1	7
CCL2	6347	-1	0	0	0	0	0	0	-1	0	0	0	0	0	0	0	-1	0	0	0	0	0	-1	0	0	0	-1	0	-1	0	0	0	-1	0	7
CCR2	729230	-1	0	0	1	0	0	0	0	0	-1	0	0	0	0	0	-1	0	0	0	0	-1	0	0	0	0	-1	-1	-1	0	0	0	0	1	7
CCR9	10803	-1	0	-1	0	0	0	-1	1	0	0	0	0	1	0	0	0	-1	0	0	0	0	-1	0	0	0	-1	0	0	-1	0	0	0	2	7
CSF3	1440	0	0	-1	-1	0	0	0	0	0	0	0	-1	-1	0	0	0	0	0	0	0	0	-1	0	0	0	0	-1	-1	0	0	0	0	0	7
CXCR5	643	0	0	-1	1	0	0	0	0	0	-1	0	-1	0	0	0	-1	0	0	0	0	0	0	0	0	0	-1	-1	-1	0	1	0	0	2	7
IFNAR2	3455	0	0	1	0	-1	0	-1	0	0	0	0	0	0	0	1	0	0	-1	-1	0	0	0	0	0	0	-1	0	-1	-1	0	0	0	2	7
IFNE	338376	0	0	-1	0	0	1	0	0	0	0	0	0	1	1	-1	0	0	0	-1	0	0	-1	0	0	0	0	0	-1	1	-1	0	-1	4	7
IL17B	27190	-1	-1	-1	0	0	0	0	0	1	0	0	0	0	0	0	0	0	0	0	0	-1	-1	0	0	0	-1	0	0	0	0	-1	0	1	7
IL2RG	3561	-1	0	0	1	-1	-1	0	1	0	-1	0	0	0	0	0	0	0	0	0	0	0	0	0	0	0	0	-1	-1	-1	1	0	0	3	7
IL31RA	133396	1	0	0	0	0	0	0	-1	-1	0	0	0	0	0	0	0	1	-1	0	0	0	-1	1	0	0	-1	0	0	-1	-1	0	0	3	7
IL3RA	3563	-1	0	-1	0	0	-1	0	0	0	-1	0	0	0	0	0	0	-1	0	0	0	0	-1	0	0	0	-1	0	0	0	0	0	0	0	7
IL6R	3570	0	0	-1	0	0	0	-1	0	-1	0	0	0	0	0	-1	0	-1	0	0	0	0	0	0	0	0	-1	0	-1	1	0	0	0	1	7
TNFAIP3	7128	1	0	0	0	0	0	0	-1	0	0	0	-1	0	0	0	-1	0	0	0	0	0	0	0	0	1	-1	-1	-1	0	0	0	-1	2	7
TNFAIP8L2	79626	-1	0	0	0	0	0	0	0	0	-1	0	0	0	-1	0	0	-1	0	0	0	0	0	0	0	0	-1	-1	0	-1	0	0	0	0	7
TNFRSF11B	4982	-1	0	-1	-1	0	0	0	1	0	0	0	0	0	0	1	0	0	0	0	1	-1	0	0	0	0	-1	0	-1	0	-1	0	0	3	7
CCL17	6361	-1	0	0	0	0	0	0	0	0	0	0	0	1	0	0	-1	-1	-1	0	0	0	0	0	0	0	-1	0	0	-1	0	0	0	1	6
CCL22	6367	0	0	0	0	0	0	0	0	0	-1	0	0	0	0	0	-1	-1	-1	0	0	0	0	0	0	0	-1	0	0	-1	1	0	0	1	6
CCL23	6368	0	0	0	0	0	0	0	0	0	0	0	-1	0	0	0	-1	-1	0	0	0	-1	-1	0	0	0	-1	0	0	0	0	0	0	0	6
CCR5	1234	-1	1	0	1	0	1	0	0	0	-1	0	0	0	0	0	-1	0	0	0	0	0	0	0	0	0	0	-1	-1	1	1	0	-1	5	6
CCRL2	9034	0	0	0	0	0	0	0	1	0	0	0	-1	0	0	0	-1	-1	0	0	0	0	0	-1	1	0	0	0	-1	-1	0	0	0	2	6
CSF2RA	1438	-1	1	0	0	0	0	0	0	0	0	0	0	0	0	-1	-1	0	0	0	0	-1	0	0	0	0	-1	0	-1	0	0	0	0	1	6
CSF2RB	1439	-1	0	0	0	0	0	0	0	0	-1	0	0	0	0	0	-1	0	0	0	0	0	0	0	0	0	-1	-1	-1	0	0	0	0	0	6
CXCL2	2920	0	0	-1	-1	0	0	0	0	0	-1	0	0	0	0	0	0	-1	0	0	0	0	-1	0	0	0	1	0	-1	0	0	0	0	1	6
CXCR2	3579	0	-1	-1	0	0	0	-1	0	0	0	0	0	0	0	0	-1	-1	0	0	0	0	-1	0	0	0	0	0	0	0	0	0	0	0	6
CXCR4	7852	0	0	1	0	0	1	0	0	0	-1	0	0	0	0	0	-1	0	0	0	0	-1	0	0	0	0	-1	0	-1	-1	0	0	0	2	6
IFNAR1	3454	0	-1	0	0	-1	0	0	0	0	0	0	0	0	0	0	-1	-1	0	-1	0	0	1	0	0	0	0	0	-1	0	0	0	0	1	6
IL10RA	3587	-1	0	0	1	0	1	-1	0	0	-1	0	0	0	0	0	-1	0	0	0	0	0	0	0	0	0	-1	0	-1	0	0	0	0	2	6
IL10RB	3588	1	-1	1	0	-1	0	0	0	0	0	0	0	0	0	1	0	0	0	0	0	0	-1	0	0	0	0	-1	-1	-1	1	0	0	4	6
IL12A	3592	0	0	1	0	0	0	-1	0	0	0	0	-1	-1	0	0	0	0	0	0	0	0	-1	0	0	1	0	0	0	1	-1	0	-1	3	6
IL13RA1	3597	0	0	-1	0	0	0	0	1	0	-1	0	0	0	-1	0	0	-1	0	0	1	0	1	0	0	-1	0	0	0	1	-1	0	0	4	6
IL17RC	84818	-1	0	1	0	0	0	0	1	0	-1	0	0	0	0	0	1	-1	0	0	0	0	-1	0	-1	1	-1	0	0	1	1	0	0	6	6
IL21R	50615	0	0	1	1	0	1	0	0	0	-1	0	0	-1	0	0	-1	0	0	0	0	-1	0	0	0	0	0	0	-1	-1	1	0	0	4	6
IL24	11009	0	0	-1	-1	0	0	0	0	0	0	0	-1	0	0	0	0	0	0	0	0	0	-1	1	0	0	0	-1	0	-1	1	0	0	2	6
IL2RB	3560	-1	1	0	1	0	1	-1	0	0	0	0	0	-1	0	0	-1	0	0	0	0	0	0	0	0	0	0	-1	-1	0	1	0	0	4	6
IL6	3569	0	0	-1	-1	0	0	0	0	0	0	0	0	-1	0	0	-1	1	0	0	0	0	-1	0	0	0	0	0	-1	0	0	0	0	1	6
ILDR1	286676	0	0	-1	0	0	-1	0	0	0	1	0	0	0	0	-1	-1	-1	0	0	0	-1	0	0	0	0	0	0	0	1	0	0	0	2	6
TGFA	7039	0	1	1	0	0	0	-1	0	0	0	-1	0	0	0	0	-1	-1	0	-1	0	0	0	0	0	-1	0	0	0	1	0	0	0	3	6
TGFBR1	7046	1	0	0	0	0	0	-1	-1	0	0	0	0	-1	0	0	-1	0	0	0	0	0	1	0	0	0	-1	0	0	1	0	-1	0	3	6
TGFBRAP1	9392	0	0	-1	0	0	0	-1	0	-1	0	0	0	-1	0	0	-1	0	0	-1	0	0	1	0	0	0	0	0	0	1	0	0	0	2	6
TNFRSF10D	8793	0	-1	0	0	0	1	0	1	0	0	0	0	0	0	0	-1	-1	0	0	0	-1	-1	0	0	-1	1	0	0	1	0	0	0	4	6
TNFRSF13B	23495	0	0	-1	0	0	0	-1	0	0	-1	0	0	0	0	0	0	-1	0	0	0	0	0	0	0	0	-1	0	-1	0	1	0	0	1	6
TNFRSF21	27242	0	0	1	0	0	0	-1	1	0	-1	0	0	0	0	0	-1	0	0	0	0	1	0	0	0	-1	0	0	0	-1	-1	0	0	3	6
TNFSF13	8741	-1	0	-1	-1	0	1	0	0	0	0	0	0	0	0	-1	-1	-1	0	0	0	0	0	0	0	0	1	0	0	1	0	0	0	3	6
TNFSF15	9966	0	0	0	-1	0	0	0	0	-1	0	0	-1	-1	0	0	-1	-1	0	0	1	0	0	0	0	0	0	0	0	0	0	0	0	1	6
BMPR1A	657	0	0	0	0	0	-1	-1	0	0	1	0	0	0	0	0	-1	0	0	0	0	0	0	0	0	0	-1	1	0	1	-1	0	0	3	5
CCL3L3	414062	-1	0	-1	0	0	0	-1	0	0	0	0	0	0	0	-1	0	0	0	0	0	0	-1	0	0	0	0	0	0	1	0	1	0	2	5
CCR1	1230	-1	0	1	1	0	0	0	-1	0	0	0	0	0	-1	0	-1	0	0	0	1	0	1	0	0	0	0	0	-1	1	0	0	0	5	5
CCR10	2826	0	0	-1	0	0	0	0	0	1	0	0	-1	0	0	1	0	1	0	0	-1	0	-1	0	0	0	-1	0	0	0	1	0	0	4	5
CCRN4L	25819	0	0	-1	0	0	1	0	-1	0	0	0	0	-1	0	0	-1	1	0	0	0	0	1	0	1	0	0	0	-1	0	1	1	0	6	5
CSF3R	1441	-1	0	-1	0	0	1	0	0	0	0	0	0	0	0	0	-1	0	0	0	0	0	0	1	0	0	0	0	-1	1	0	0	-1	3	5
CXCL6	6372	0	0	0	0	0	0	0	0	0	0	0	0	1	0	0	-1	-1	-1	0	0	0	-1	0	0	0	-1	0	0	0	0	0	0	1	5
CXCR2P1	3580	0	1	1	1	0	1	-1	-1	0	-1	0	-1	0	0	1	0	1	0	0	0	0	1	0	0	0	1	0	0	0	1	0	-1	9	5
CXCR6	10663	-1	1	0	1	0	1	0	0	0	0	0	0	-1	0	0	-1	0	0	0	0	0	0	0	0	0	0	-1	-1	1	1	0	0	5	5
EPOR	2057	0	0	-1	-1	0	1	0	0	0	0	0	0	0	0	0	-1	0	0	0	-1	0	-1	0	1	1	0	1	0	0	0	0	0	4	5
IL10	3586	0	0	1	0	0	1	0	0	0	-1	0	0	0	0	0	-1	0	0	0	0	0	0	0	0	1	0	0	-1	0	-1	0	-1	3	5
IL13RA2	3598	0	0	0	0	0	-1	0	0	0	0	0	0	-1	0	1	0	-1	0	0	0	0	0	0	0	0	0	0	-1	0	-1	0	0	1	5
IL17RA	23765	0	0	0	0	0	1	0	0	-1	0	0	0	-1	-1	-1	0	0	0	0	0	0	0	0	0	0	0	0	-1	0	1	0	0	2	5
IL17RD	54756	0	0	-1	0	0	-1	0	0	0	0	0	0	1	0	0	-1	1	0	0	1	0	0	0	0	1	-1	0	0	1	-1	0	0	5	5
IL17REL	400935	1	0	0	0	-1	1	-1	1	0	-1	0	0	0	1	-1	0	0	0	0	0	0	0	1	0	0	0	0	-1	0	0	0	0	5	5
IL18	3606	0	0	0	0	0	1	0	0	0	0	0	0	1	0	0	-1	-1	0	0	0	0	-1	0	0	0	1	-1	0	0	0	0	-1	3	5
IL18BP	10068	-1	1	1	1	0	1	0	-1	0	0	0	-1	0	0	0	-1	1	0	0	0	0	0	0	0	0	0	0	-1	0	0	0	0	5	5
IL1R2	7850	0	0	1	0	0	1	0	0	0	0	0	0	-1	0	0	0	0	0	-1	0	0	-1	0	0	0	1	0	-1	0	-1	0	0	3	5
IL1RL1	9173	0	-1	-1	0	0	0	0	0	0	0	0	0	0	0	0	-1	0	-1	0	0	0	0	0	0	0	-1	0	0	0	1	0	0	1	5
IL20	50604	0	0	-1	0	0	0	0	-1	0	0	-1	0	-1	0	0	0	0	0	0	0	0	0	0	0	-1	0	0	0	0	0	0	0	0	5
IL20RA	53832	0	0	-1	0	0	-1	0	0	0	0	0	0	0	0	0	0	-1	0	0	0	-1	0	0	0	-1	1	0	0	1	0	0	0	2	5
IL23R	149233	0	-1	-1	0	0	-1	0	0	0	0	0	0	0	1	0	0	-1	0	0	1	0	0	0	0	0	-1	0	0	0	0	0	0	2	5
IL7	3574	-1	0	0	0	0	0	-1	0	0	0	-1	0	0	0	1	0	-1	0	0	0	0	0	0	0	1	1	0	-1	1	0	0	0	4	5
TGFBI	7045	-1	0	0	0	0	-1	0	0	0	-1	0	0	0	0	0	0	0	0	0	1	0	0	0	0	0	-1	-1	0	1	0	0	0	2	5
TNF	7124	-1	0	0	0	0	0	0	0	0	-1	0	0	0	0	0	-1	0	-1	0	0	0	0	0	0	0	0	0	0	0	0	0	-1	0	5
TNFAIP8	25816	0	0	0	0	0	1	0	-1	0	0	0	0	1	0	0	0	-1	0	0	0	0	0	0	0	0	-1	-1	0	-1	1	0	0	3	5
TNFRSF10B	8795	0	-1	-1	0	0	1	0	0	0	1	0	0	0	0	0	-1	-1	0	0	0	0	-1	0	0	0	1	0	0	1	1	0	0	5	5
TNFRSF11A	8792	-1	1	0	0	0	1	-1	1	0	0	0	0	0	0	-1	0	0	0	0	0	0	0	0	0	-1	1	0	-1	1	0	0	0	5	5
TNFRSF14	8764	0	0	-1	0	0	1	1	1	0	-1	0	0	1	0	0	0	-1	0	0	0	0	-1	0	0	0	1	0	0	-1	0	0	0	5	5
TNFRSF1B	7133	0	0	0	1	0	0	0	0	0	-1	0	-1	0	0	0	-1	-1	0	0	0	0	0	0	0	0	0	-1	0	0	0	0	0	1	5
TNFRSF25	8718	0	0	0	1	0	0	0	0	0	0	0	0	1	0	0	0	1	0	-1	-1	0	-1	1	0	0	0	-1	0	0	0	0	-1	4	5
TNFSF11	8600	0	0	-1	0	-1	-1	0	0	0	0	0	0	0	0	0	0	0	0	0	0	0	0	0	-1	0	-1	0	0	0	0	0	0	0	5
BMP2K	55589	0	0	-1	1	0	0	0	0	-1	0	0	0	0	0	0	-1	0	0	0	1	0	1	0	1	0	-1	0	0	0	0	0	0	4	4
CCL11	6356	0	0	0	0	0	0	0	0	0	0	0	-1	0	0	0	-1	1	0	0	0	-1	0	0	0	0	-1	0	0	0	1	0	0	2	4
CCL13	6357	-1	0	1	0	0	1	0	0	0	0	0	0	0	1	0	0	-1	0	0	0	-1	0	0	0	0	0	0	0	-1	1	0	0	4	4
CCL14-CCL15	348249	0	0	0	0	0	-1	0	1	0	0	0	0	0	0	1	1	-1	0	0	0	0	0	0	0	0	-1	0	0	0	-1	0	0	3	4
CCL15	6359	0	0	0	0	0	-1	1	1	0	1	0	0	1	0	0	1	-1	0	0	0	0	0	0	0	0	-1	0	0	0	-1	0	0	5	4
CCL5	6352	-1	1	0	1	0	1	0	0	0	0	0	-1	0	0	0	0	1	0	0	0	0	0	0	0	0	0	-1	-1	0	1	0	0	5	4
CXCL1	2919	0	0	0	-1	0	1	0	0	0	0	0	0	1	0	0	0	-1	0	0	0	0	-1	0	0	0	1	0	0	1	-1	0	0	4	4
CXCL3	2921	0	0	0	-1	0	0	0	1	0	-1	0	0	0	0	-1	0	0	0	0	0	0	0	0	1	1	1	0	0	-1	0	0	0	4	4
CXCL5	6374	-1	0	1	0	0	0	0	0	0	0	0	0	0	0	-1	0	0	0	0	0	0	0	0	0	0	0	0	0	0	-1	0	-1	1	4
CXCL9	4283	0	1	1	1	0	1	0	0	0	-1	0	-1	-1	0	0	0	1	1	0	0	0	1	0	1	1	1	0	-1	1	1	0	0	12	4
CXCR3	2833	0	1	0	1	0	0	0	0	0	-1	0	0	-1	0	0	0	0	0	0	0	0	0	0	0	0	0	-1	-1	0	1	0	0	3	4
IL18RAP	8807	0	1	0	1	0	1	0	0	0	0	0	0	0	0	0	-1	0	0	0	0	0	-1	0	0	1	0	-1	-1	1	0	0	0	5	4
IL1B	3553	0	0	-1	0	0	1	0	1	0	0	0	0	0	0	0	-1	0	0	0	1	0	0	1	0	0	1	-1	-1	0	0	0	0	5	4
IL1RAP	3556	0	0	0	0	0	0	-1	-1	0	0	0	0	-1	0	0	-1	0	0	0	1	0	0	0	0	1	0	0	0	1	0	0	0	3	4
IL1RAPL1	11141	0	0	-1	1	0	0	0	0	0	0	0	0	0	0	-1	0	0	0	0	0	0	1	0	0	0	-1	0	0	1	-1	0	0	3	4
IL1RAPL2	26280	0	0	0	-1	0	0	0	-1	0	0	0	0	0	0	0	0	0	0	0	0	0	0	0	0	0	-1	0	0	0	0	-1	0	0	4
IL1RL2	8808	0	0	0	0	0	0	0	0	0	0	0	0	0	0	-1	0	0	0	-1	0	0	-1	0	0	0	0	0	0	1	-1	0	0	1	4
IL20RB	53833	1	0	1	1	0	0	0	-1	0	0	1	0	0	0	1	0	1	0	0	0	0	-1	0	1	-1	0	0	0	-1	0	0	0	7	4
IL22RA1	58985	0	0	0	0	0	-1	0	1	1	0	0	1	1	1	1	0	-1	0	0	0	0	-1	-1	0	0	0	0	0	0	0	0	0	6	4
IL22RA2	116379	0	0	1	0	0	0	0	-1	0	-1	0	0	-1	0	0	0	-1	0	0	0	0	0	0	0	0	0	0	0	0	0	0	0	1	4
IL26	55801	0	0	0	0	0	0	0	0	0	-1	0	0	0	0	0	-1	0	0	0	0	0	0	0	1	0	0	-1	-1	1	0	0	0	2	4
IL27RA	9466	0	0	0	1	0	1	0	-1	0	0	0	0	0	0	0	0	0	0	0	0	0	-1	0	0	0	0	-1	0	-1	0	1	0	3	4
IL9R	3581	0	0	0	1	0	1	0	0	-1	0	0	0	-1	0	0	-1	0	0	0	0	0	0	0	0	0	0	1	0	-1	1	0	0	4	4
TNFRSF10A	8797	0	0	0	0	0	1	-1	0	-1	1	0	0	0	0	0	-1	-1	0	0	1	0	0	0	0	0	1	0	0	1	0	0	0	5	4
TNFRSF10C	8794	0	-1	-1	0	0	0	0	1	0	0	0	0	0	0	0	0	-1	0	0	0	0	-1	0	0	0	0	1	0	1	0	0	0	3	4
TNFRSF13C	115650	1	0	0	0	0	0	0	-1	0	0	0	0	-1	0	0	0	0	0	1	0	0	0	1	0	0	-1	0	-1	0	0	0	0	3	4
TNFRSF1A	7132	0	0	0	0	0	0	0	0	0	0	0	0	0	0	0	0	0	0	0	0	-1	-1	0	0	0	-1	0	-1	0	0	0	0	0	4
XCL1	6375	-1	1	0	1	0	0	0	-1	0	1	0	0	0	1	0	1	1	0	0	0	0	0	0	1	1	0	0	-1	0	0	0	-1	8	4
XCL2	6846	-1	0	0	1	0	1	-1	-1	0	0	0	0	0	0	0	0	1	1	0	0	0	0	0	0	1	0	0	-1	0	0	0	0	5	4
BMP1	649	1	0	0	0	0	1	0	0	0	-1	0	0	0	0	1	0	0	0	0	0	-1	-1	0	0	0	0	0	0	1	0	0	0	4	3
BMP10	27302	0	-1	0	0	0	0	-1	0	0	0	0	0	0	0	0	-1	0	0	0	0	0	0	0	0	0	0	0	0	0	0	0	0	0	3
BMP2	650	0	0	0	0	0	0	0	0	0	-1	0	0	0	0	0	0	-1	0	1	0	0	0	0	0	0	0	0	-1	1	1	0	0	3	3
CCL24	6369	0	0	0	0	0	0	0	0	0	0	0	0	0	0	1	-1	0	0	-1	0	0	0	0	0	-1	0	0	0	0	0	0	0	1	3
CCL26	10344	0	0	0	0	0	0	0	0	0	1	0	-1	-1	0	0	0	1	0	0	0	0	-1	0	1	0	0	0	0	0	0	0	0	3	3
CCL28	56477	0	0	-1	0	0	0	0	1	0	0	0	0	0	0	0	0	0	0	0	0	0	-1	0	-1	0	1	0	0	0	0	0	0	2	3
CCL4	6351	-1	1	0	1	0	1	0	0	0	-1	0	0	0	0	0	0	1	0	0	0	0	0	0	1	0	1	0	-1	0	1	0	0	7	3
CCL8	6355	0	1	1	1	0	1	0	-1	0	0	0	-1	0	0	0	0	1	0	0	0	0	0	0	0	1	1	0	-1	1	1	0	0	9	3
CSF2	1437	0	0	1	-1	0	0	0	0	0	0	0	0	0	0	0	-1	-1	0	0	0	0	0	0	0	0	1	0	0	0	0	0	0	2	3
CXCL10	3627	0	1	1	1	0	1	0	0	0	-1	0	0	-1	0	1	0	1	0	0	0	0	1	0	1	1	1	0	-1	1	1	0	0	12	3
CXCL11	6373	0	1	1	1	0	1	0	0	0	-1	0	0	0	0	1	0	1	0	0	1	0	0	0	0	1	1	0	-1	1	1	0	-1	11	3
CXCL13	10563	0	1	0	1	0	1	0	0	0	-1	1	0	-1	0	0	0	1	0	1	0	0	0	0	0	1	0	0	-1	0	1	0	0	8	3
CXCL16	58191	0	0	0	0	0	1	0	1	0	1	0	0	0	0	0	-1	-1	0	-1	0	0	0	0	0	0	1	0	0	1	0	0	0	5	3
CXCL17	284340	0	1	0	0	0	0	0	0	0	0	0	0	0	0	0	0	-1	0	0	0	0	-1	0	0	0	-1	0	0	0	0	0	0	1	3
IFNA1	3439	0	-1	0	-1	0	0	0	0	0	0	0	0	1	0	0	0	0	0	0	0	0	-1	0	0	0	0	0	0	1	0	0	0	2	3
IL12RB1	3594	0	0	0	1	0	1	0	0	0	0	0	0	0	0	0	-1	0	0	0	0	0	0	0	0	0	0	0	-1	-1	1	0	0	3	3
IL17RB	55540	0	0	-1	-1	0	0	0	1	0	0	0	0	1	0	0	0	-1	0	0	0	0	0	0	0	0	1	1	0	0	1	1	0	6	3
IL18R1	8809	1	1	0	0	0	0	0	0	0	-1	0	0	0	0	0	-1	0	0	0	0	0	-1	0	0	0	0	0	0	1	0	0	0	3	3
IL19	29949	0	0	1	-1	0	0	0	0	0	0	0	-1	0	0	0	0	0	0	0	0	0	0	0	0	0	0	-1	0	0	0	0	0	1	3
IL1F5	26525	0	0	1	0	0	0	0	-1	0	0	0	0	-1	0	0	0	1	0	0	0	0	1	0	0	-1	0	0	0	0	0	0	0	3	3
IL1F6	27179	0	0	0	0	0	0	0	0	0	0	0	0	0	0	0	0	0	0	0	0	0	-1	0	0	-1	0	0	0	-1	0	0	0	0	3
IL1F9	56300	1	0	1	1	0	0	0	-1	0	0	0	0	0	0	1	0	0	0	0	0	0	0	1	1	-1	0	0	0	-1	0	0	0	6	3
IL2	3558	0	0	0	0	0	0	0	0	0	-1	0	0	0	0	0	0	-1	0	0	0	0	0	0	0	0	-1	0	0	1	0	0	0	1	3
IL23A	51561	0	0	1	0	0	0	0	0	0	0	0	0	0	0	0	0	0	-1	0	0	0	0	0	0	0	0	0	0	-1	-1	0	0	1	3
IL2RA	3559	0	0	1	1	0	1	-1	0	0	0	0	0	0	0	0	-1	1	0	0	0	0	1	0	1	0	0	0	-1	0	0	0	0	6	3
ILKAP	80895	1	0	1	0	0	0	1	0	1	0	0	0	0	0	1	1	0	1	0	-1	0	-1	0	0	1	1	0	0	-1	1	0	0	10	3
TNFAIP2	7127	0	0	1	0	0	1	0	0	0	0	0	0	1	0	0	-1	0	-1	0	0	0	-1	0	1	0	1	0	0	1	0	0	0	6	3
TNFAIP6	7130	0	0	0	0	0	0	0	-1	0	-1	0	0	0	0	1	-1	1	0	0	0	0	0	0	0	0	1	0	0	1	0	0	0	4	3
TNFRSF4	7293	0	0	1	0	0	0	0	0	0	-1	0	0	0	0	0	0	0	0	0	-1	0	-1	0	0	0	0	0	0	0	0	0	0	1	3
TNFRSF6B	8771	1	0	0	-1	0	1	0	1	0	-1	0	0	1	0	0	0	0	0	0	0	0	-1	0	0	0	1	0	0	0	0	0	0	5	3
TNFSF13B	10673	0	1	1	1	0	1	0	0	0	0	0	0	0	0	0	-1	0	0	0	1	0	1	0	0	0	0	0	-1	0	0	0	-1	6	3
TNFSF18	8995	-1	0	0	0	0	0	0	0	0	1	0	0	0	0	0	-1	0	0	0	0	0	1	0	0	0	-1	0	0	0	0	0	0	2	3
TPO	7173	0	0	-1	0	0	1	0	0	0	0	0	0	0	0	0	0	0	0	0	0	0	0	0	0	-1	-1	0	0	1	0	0	0	2	3
BMP15	9210	0	0	0	0	0	0	0	0	0	0	0	0	0	0	0	0	0	0	0	0	0	-1	0	0	0	0	0	0	0	-1	0	0	0	2
BMP8B	656	1	1	0	0	0	0	-1	0	0	0	0	0	0	0	0	0	1	0	0	0	0	1	0	0	0	1	0	-1	1	0	0	0	6	2
CCL18	6362	0	1	1	0	0	1	0	0	0	0	0	0	0	0	0	-1	0	0	0	0	0	1	0	0	0	1	0	0	-1	1	0	0	6	2
CCL20	6364	0	0	1	0	0	0	0	0	0	0	0	0	0	0	0	0	0	0	0	0	0	-1	0	0	0	1	0	0	1	0	0	-1	3	2
CCL27	10850	0	0	0	0	0	0	0	0	1	-1	0	0	0	0	0	0	0	0	0	0	0	0	0	0	0	0	0	0	-1	0	0	0	1	2
CCL4L2	388372	-1	1	0	1	0	1	0	0	0	0	0	0	0	0	0	0	1	0	0	0	0	0	0	1	0	1	0	-1	0	1	0	0	7	2
CCR3	1232	0	0	0	0	0	0	-1	0	0	0	0	0	0	0	0	0	0	0	0	0	0	0	0	0	0	0	0	0	0	-1	0	0	0	2
CCR8	1237	0	1	1	1	0	0	-1	0	0	0	0	0	0	0	0	-1	0	0	0	0	0	1	0	0	0	0	0	0	0	1	0	0	5	2
IFNA13	3447	0	-1	0	0	0	0	0	0	0	0	0	0	0	0	0	0	0	0	0	0	0	-1	0	0	0	0	0	0	0	0	0	0	0	2
IFNG	3458	0	1	1	1	0	1	0	0	0	0	0	0	-1	0	0	0	1	0	0	0	0	1	0	0	1	1	0	-1	1	1	0	0	10	2
IFNGR2	3460	0	0	0	0	0	0	0	0	0	0	0	0	0	-1	0	-1	0	0	0	0	0	0	0	0	0	1	0	0	1	0	0	0	2	2
IFNK	56832	0	0	0	0	0	0	0	0	0	0	0	-1	0	0	0	0	1	0	0	0	0	0	0	0	0	0	0	0	-1	0	0	0	1	2
IL15RA	3601	0	0	0	1	0	1	0	0	0	0	0	0	-1	0	0	0	0	0	0	0	0	-1	0	1	0	1	0	0	1	0	0	0	5	2
IL17F	112744	0	0	0	0	0	0	-1	0	0	0	0	0	0	0	0	0	0	0	0	0	0	0	0	0	0	0	0	0	-1	0	0	0	0	2
IL1F10	84639	0	0	0	0	0	0	0	0	0	0	0	0	0	0	0	0	0	0	0	0	0	1	0	0	-1	0	0	0	0	-1	0	0	1	2
IL1F7	27178	1	1	0	-1	0	0	0	1	0	0	0	0	0	0	0	0	0	0	0	0	0	0	1	0	-1	0	0	1	0	0	0	0	5	2
IL1F8	27177	0	0	1	0	0	0	0	0	0	0	0	0	-1	0	0	0	0	0	0	0	0	0	0	0	-1	0	0	0	0	0	0	0	1	2
IL1RN	3557	0	0	0	1	0	1	0	0	0	0	0	0	0	0	0	0	-1	0	0	0	0	-1	0	1	0	1	0	0	0	0	0	0	4	2
IL27	246778	0	0	1	1	0	0	0	-1	0	0	0	0	0	0	0	0	1	1	0	0	0	-1	0	0	0	0	0	0	0	1	0	0	5	2
IL32	9235	0	0	1	0	0	0	0	1	0	-1	0	0	1	0	0	0	0	0	0	0	0	0	0	0	0	1	0	0	-1	0	0	0	4	2
IL4	3565	0	0	0	0	0	0	0	0	0	0	0	0	0	0	0	0	-1	0	-1	0	0	0	0	0	0	0	0	0	0	0	0	0	0	2
IL4I1	259307	0	0	1	1	0	1	1	-1	0	0	0	0	0	0	0	0	1	0	0	0	0	0	0	1	0	1	0	0	0	-1	0	0	7	2
IL5	3567	0	0	-1	0	0	0	0	0	0	0	0	0	0	0	0	0	0	0	0	0	0	0	0	0	0	-1	0	0	0	0	0	0	0	2
IL8	3576	0	0	1	-1	0	1	0	0	0	1	0	0	0	0	0	0	0	0	0	0	0	0	0	1	0	1	0	0	-1	0	0	0	5	2
IL9	3578	0	0	-1	0	0	0	0	0	0	0	0	0	0	0	-1	0	0	0	0	0	0	0	0	0	0	0	0	0	0	0	0	0	0	2
ILDR2	387597	0	0	0	1	0	0	0	0	0	0	-1	0	0	0	0	0	0	0	0	0	0	0	0	0	0	-1	1	0	0	0	0	0	2	2
ILF3	3609	1	0	1	0	0	0	-1	0	0	1	1	0	0	0	1	0	0	0	0	-1	0	0	1	0	0	1	1	0	0	0	0	0	8	2
ILVBL	10994	0	0	1	0	0	0	1	0	1	1	0	1	0	0	0	0	0	0	0	-1	0	-1	0	0	0	0	0	0	0	0	0	0	5	2
TNFRSF17	608	0	0	0	0	0	0	0	0	0	0	0	0	0	1	0	0	0	0	1	0	0	0	0	0	0	0	0	-1	-1	1	0	0	3	2
TNFRSF18	8784	0	0	0	0	0	1	1	-1	0	1	0	0	0	0	0	0	0	0	0	0	0	-1	0	0	0	1	0	0	0	0	0	0	4	2
TNFRSF8	943	0	0	0	0	0	0	0	0	0	0	0	0	0	0	0	-1	0	0	0	0	0	0	0	0	0	0	0	0	-1	0	0	0	0	2
TNFSF12-TNFSF13	407977	-1	0	1	1	0	0	0	0	0	0	0	0	1	0	0	0	0	0	0	0	0	-1	0	0	0	0	0	0	0	0	0	0	3	2
TNFSF4	7292	1	0	0	1	0	0	0	-1	0	0	0	0	0	0	0	0	1	0	0	1	0	0	0	0	0	0	0	0	0	0	-1	0	4	2
CCL25	6370	0	0	1	0	0	1	0	0	0	0	0	0	0	0	1	0	0	0	0	0	0	0	0	0	0	0	0	0	-1	0	0	0	3	1
CCL3L1	6349	-1	0	0	0	0	1	0	0	0	0	0	0	0	0	0	0	1	0	0	0	0	0	0	0	0	1	0	0	0	0	0	0	3	1
CXCR1	3577	0	0	0	0	0	1	-1	0	0	0	0	0	0	0	0	0	0	0	0	0	0	0	1	0	0	0	0	0	0	0	0	0	2	1
EPO	2056	1	1	1	0	0	0	0	-1	0	0	0	0	0	0	0	0	0	0	0	0	0	0	0	0	0	0	0	0	0	0	0	0	3	1
IFNA14	3448	0	0	-1	0	0	0	0	0	0	0	0	0	0	0	0	0	0	0	0	0	0	0	0	1	0	0	0	0	0	0	0	0	1	1
IFNA17	3451	0	0	0	0	0	0	0	0	0	0	0	0	0	0	0	0	0	0	0	0	-1	0	0	0	0	0	0	0	0	0	0	0	0	1
IFNA21	3452	0	0	0	0	0	0	0	0	0	0	0	0	-1	0	0	0	0	0	0	0	0	0	0	1	0	0	0	0	0	0	0	0	1	1
IFNA4	3441	0	0	0	0	0	0	0	0	0	0	0	0	0	0	0	0	0	0	0	0	0	0	0	0	0	0	-1	0	0	0	0	0	0	1
IFNA5	3442	0	0	0	0	0	0	0	0	0	0	0	0	0	0	0	0	0	0	0	0	0	0	0	0	0	0	0	-1	0	0	0	0	0	1
IFNA7	3444	0	0	0	0	0	0	0	0	0	0	0	0	0	0	0	0	0	0	0	0	0	0	0	0	0	0	0	-1	0	0	0	0	0	1
IFNA8	3445	0	0	0	0	0	0	0	0	-1	0	0	0	0	0	0	0	0	0	0	0	0	0	0	0	0	0	0	0	1	0	0	0	1	1
IFNB1	3456	0	0	0	0	0	0	0	-1	0	0	0	0	0	0	0	0	0	0	0	0	0	0	0	0	0	0	0	0	0	0	1	0	1	1
IFNW1	3467	0	0	0	0	0	0	0	0	0	0	0	0	0	0	-1	0	0	0	0	0	0	0	0	0	0	0	0	0	0	0	0	0	0	1
IL12RB2	3595	0	1	1	1	0	1	0	0	0	-1	0	0	1	0	0	0	1	0	0	0	0	0	1	0	0	0	0	0	1	0	0	0	8	1
IL13	3596	1	0	0	1	0	0	0	0	0	0	0	0	0	0	0	0	-1	0	0	0	0	0	0	0	0	0	0	0	0	0	0	0	2	1
IL15	3600	0	0	0	1	0	1	0	0	0	0	0	0	0	0	0	0	0	0	0	0	0	-1	0	0	0	0	0	0	0	0	0	0	2	1
IL17A	3605	0	0	0	0	0	0	0	0	0	-1	0	0	0	0	0	0	0	0	0	1	0	0	0	0	0	0	0	0	0	1	0	0	2	1
IL21	59067	0	0	0	1	0	0	0	0	0	0	0	0	0	0	0	0	0	0	0	0	0	0	0	0	0	1	0	-1	0	1	0	0	3	1
IL22	50616	0	-1	0	0	0	0	0	0	0	0	0	0	0	0	0	0	0	0	0	0	0	0	0	0	0	0	0	0	0	0	0	0	0	1
IL25	64806	0	0	0	0	0	0	0	0	0	1	0	0	0	0	0	0	0	0	0	0	0	-1	0	0	0	0	0	0	0	0	0	0	1	1
IL28B	282617	0	0	1	1	0	0	0	0	0	0	0	0	0	0	-1	0	0	1	0	0	0	0	0	0	0	0	0	0	0	0	0	0	3	1
IL29	282618	0	0	1	1	0	0	0	0	0	0	0	0	0	0	0	0	0	0	0	0	0	0	0	0	0	0	-1	0	0	0	0	0	2	1
IL31	386653	0	0	0	0	0	0	0	0	0	0	0	0	0	0	0	0	0	0	0	0	0	0	0	0	0	-1	1	0	0	0	0	0	1	1
ILF2	3608	1	1	1	0	0	0	0	0	1	1	0	0	0	0	1	1	1	0	1	0	0	1	0	1	0	1	0	1	-1	0	0	0	13	1
TNFAIP1	7126	0	1	0	0	0	0	0	0	0	0	0	0	0	0	0	0	0	-1	0	0	0	0	0	0	0	0	0	0	1	0	0	0	2	1
TNFAIP8L1	126282	0	0	-1	0	0	0	0	0	0	0	0	0	0	0	0	0	0	0	0	0	0	0	0	0	0	0	0	0	0	0	0	0	0	1
TNFRSF12A	51330	0	0	1	0	0	0	0	0	0	0	0	0	1	0	1	1	0	0	0	0	0	0	-1	0	1	0	0	0	1	0	0	0	6	1
TNFRSF9	3604	1	0	1	1	0	0	-1	0	0	0	0	0	0	0	0	0	1	0	0	0	0	1	0	1	0	0	0	0	0	0	0	0	6	1
TNFSF9	8744	0	0	1	0	0	1	0	0	0	1	0	0	0	0	0	0	0	0	0	0	0	0	0	1	-1	1	0	0	1	1	1	0	8	1
CCL1	6346	0	0	0	0	0	0	0	0	0	0	0	0	0	0	0	0	0	0	0	0	0	0	0	0	0	0	0	0	0	0	0	0	0	0
CCL3	6348	0	1	0	1	0	1	0	0	0	0	0	0	0	0	0	0	1	0	0	0	0	0	0	1	0	1	0	0	0	1	0	0	7	0
CCL7	6354	0	0	1	0	0	1	0	0	0	0	0	0	0	0	0	0	1	0	0	0	0	0	0	0	0	1	0	0	1	0	0	0	5	0
IFNA10	3446	0	0	0	0	0	0	0	0	0	0	0	0	0	0	0	0	0	0	0	0	0	0	0	0	0	0	0	0	0	0	0	0	0	0
IFNA16	3449	0	0	0	0	0	0	0	0	0	0	0	0	0	0	0	0	0	0	0	0	0	0	0	0	0	0	0	0	0	0	0	0	0	0
IFNA2	3440	0	0	0	0	0	0	0	0	0	0	0	0	0	0	0	0	0	0	0	0	0	0	0	0	0	0	0	0	0	0	0	0	0	0
IFNA6	3443	0	0	0	0	0	0	0	0	0	0	0	0	0	0	0	0	0	0	0	0	0	0	0	0	0	0	0	0	0	0	0	0	0	0
IL11	3589	1	0	0	0	0	0	0	0	0	0	0	0	0	0	0	0	1	0	0	1	0	0	0	0	0	0	0	0	1	0	0	0	4	0
IL17C	27189	1	0	1	0	0	1	0	1	0	0	0	0	0	0	0	0	1	0	0	0	1	0	0	0	0	1	0	0	0	1	0	0	8	0
IL1A	3552	0	0	1	0	0	0	0	0	0	0	0	0	0	0	0	0	0	0	0	0	0	0	0	0	0	0	0	0	0	1	0	0	2	0
IL28A	282616	0	0	1	1	0	0	0	0	0	0	0	0	0	0	0	0	0	0	0	0	0	0	0	0	0	0	0	0	0	0	0	0	2	0
IL3	3562	0	0	0	0	0	0	0	0	0	0	0	0	0	0	0	0	0	0	0	0	0	0	0	0	0	0	0	0	0	0	0	0	0	0
Number of highly-expressed genes in higher-TMB cancer		22	34	58	54	0	66	8	26	7	18	3	2	24	8	24	7	39	5	5	21	3	27	12	29	21	49	10	2	76	50	6	0
Number of highly-expressed genes in lower-TMB cancer		54	28	74	27	12	26	46	50	12	71	7	34	46	8	26	98	80	21	17	8	27	77	6	12	29	89	42	86	47	39	5	24
Table S7. Comparisons of cytokine and cytokine receptor genes expression levels between the lower-TMB and the higher-TMB subtypes of cancers.
Note:
"1" indicates that the gene is more highly expressed in higher-TMB cancers than in lower-TMB cancers.
"-1" indicates that the gene is more highly expressed in lower-TMB cancers than in higher-TMB cancers.
"0" indicates that the gene has no significant expression differences between higher-TMB and lower-TMB cancers.

## Sheet: Table S8
Gene symbol	Gene ID	ACC	BLCA	BRCA	CESC	CHOL	COAD	DLBC	ESCA	GBM	HNSC	KICH	KIRC	KIRP	LAML	LGG	LIHC	LUAD	LUSC	OV	PAAD	PCPG	PRAD	READ	SARC	SKCM	STAD	TGCT	THCA	THYM	UCEC	UCS	UVM	Number of cancer types with the gene highly-expressed in higher-TMB cancer	Number of cancer types with the gene high-expressed in lower-TMB cancer
CXCL10	3627	0	1	1	1	0	1	0	0	0	-1	0	0	-1	0	1	0	1	0	0	0	0	1	0	1	1	1	0	-1	1	1	0	0	12	3
CXCL9	4283	0	1	1	1	0	1	0	0	0	-1	0	-1	-1	0	0	0	1	1	0	0	0	1	0	1	1	1	0	-1	1	1	0	0	12	4
IFNG	3458	0	1	1	1	0	1	0	0	0	0	0	0	-1	0	0	0	1	0	0	0	0	1	0	0	1	1	0	-1	1	1	0	0	10	2
GZMB	3002	0	1	1	1	0	1	0	0	0	0	0	0	0	0	1	0	1	0	0	0	0	-1	0	0	1	1	0	0	0	1	0	0	9	1
CXCL13	10563	0	1	0	1	0	1	0	0	0	-1	1	0	-1	0	0	0	1	0	1	0	0	0	0	0	1	0	0	-1	0	1	0	0	8	3
STAT1	6772	1	1	1	1	0	1	0	-1	0	0	0	0	0	0	0	-1	1	0	0	0	0	0	0	0	1	1	0	-1	0	0	0	0	8	3
IRF1	3659	0	1	0	1	0	1	0	0	0	0	0	0	0	0	1	0	0	0	0	0	0	-1	0	1	1	1	0	-1	0	0	0	0	7	2
CCL5	6352	-1	1	0	1	0	1	0	0	0	0	0	-1	0	0	0	0	1	0	0	0	0	0	0	0	0	0	-1	-1	0	1	0	0	5	4
GNLY	10578	0	1	1	0	0	1	0	0	0	0	0	0	0	0	0	0	1	0	0	0	0	-1	0	0	0	1	0	0	0	0	0	0	5	1
TBX21	30009	-1	1	0	1	0	1	0	0	0	-1	0	0	0	0	1	-1	0	0	0	0	0	0	0	0	0	0	-1	-1	0	1	0	0	5	5
CD8B	926	0	0	0	1	0	0	0	0	0	-1	0	0	0	0	0	0	1	1	0	0	0	-1	0	0	1	0	0	-1	-1	0	0	0	4	4
PRF1	5551	-1	0	0	1	0	1	0	0	0	0	0	0	0	0	0	-1	0	0	0	0	0	-1	0	0	0	1	0	-1	-1	1	0	0	4	5
IL12A	3592	0	0	1	0	0	0	-1	0	0	0	0	-1	-1	0	0	0	0	0	0	0	0	-1	0	0	1	0	0	0	1	-1	0	-1	3	6
IL12B	3593	0	0	0	0	0	0	0	0	0	-1	0	0	-1	0	0	-1	-1	0	0	0	0	0	0	1	0	-1	-1	-1	-1	1	0	0	2	8
CD19	930	0	0	0	0	0	0	0	0	0	0	0	0	-1	0	0	0	0	0	0	0	0	0	0	0	0	-1	-1	-1	0	0	0	0	0	4
Number of highly-expressed genes in higher-TMB cancer		1	10	7	11	0	11	0	0	0	0	1	0	0	0	4	0	9	2	1	0	0	3	0	4	9	8	0	0	4	9	0	0
Number of highly-expressed genes in lower-TMB cancer		3	0	0	0	0	0	1	1	0	6	0	3	7	0	0	4	1	0	0	0	0	6	0	0	0	2	4	12	3	1	0	1
Table S8. Comparisons of pro-inflammatory genes expression levels between the lower-TMB and the higher-TMB subtypes of cancers.
Note:
"1" indicates that the gene is more highly expressed in higher-TMB cancers than in lower-TMB cancers.
"-1" indicates that the gene is more highly expressed in lower-TMB cancers than in higher-TMB cancers.
"0" indicates that the gene has no significant expression differences between higher-TMB and lower-TMB cancers.
