# Supplementary material for: Correlate tumor mutation burden with immune signatures in human cancers
Source: BMC Immunol. 2019 Jan 11;20:4. doi: 10.1186/s12865-018-0285-5 (PMC6329192; doi:10.1186/s12865-018-0285-5)
Supplement: Supplementary file 2 — Table S9. Comparison of the results obtained by using different cutoffs to define the higher-TMB and the lower-TMB tumor samples. (XLSX 21 kb) [file 12865_2018_285_MOESM2_ESM.xlsx]

## Sheet: Treg
higher-TMB (upper quartile) vs. lower-TMB (lower quartile)	higher-TMB (upper third) vs. lower-TMB (lower third)	higher-TMB (upper half) vs. lower-TMB (lower half)
Cancer_type	Cancer_type	Cancer_type
ACC	ACC	ACC
BLCA	BLCA	BLCA
BRCA	BRCA	BRCA
CESC	CESC	CESC
CHOL	CHOL	CHOL
COAD	COAD	COAD
DLBC	DLBC	DLBC
ESCA	ESCA	ESCA
GBM	GBM	GBM
HNSC	HNSC	HNSC
KICH	KICH	KICH
KIRC	KIRC	KIRC
KIRP	KIRP	KIRP
LAML	LAML	LAML
LGG	LGG	LGG
LIHC	LIHC	LIHC
LUAD	LUAD	LUAD
LUSC	LUSC	LUSC
OV	OV	OV
PAAD	PAAD	PAAD
PCPG	PCPG	PCPG
PRAD	PRAD	PRAD
READ	READ	READ
SARC	SARC	SARC
SKCM	SKCM	SKCM
STAD	STAD	STAD
TGCT	TGCT	TGCT
THCA	THCA	THCA
THYM	THYM	THYM
UCEC	UCEC	UCEC
UCS	UCS	UCS
UVM	UVM	UVM
Note:
The red indicates that the gene-set is more highly expressed in the higher-TMB subtype than in the lower-TMB subtype of the cancer.
The blue indicates that the gene-set is more highly expressed in the lower-TMB subtype than in the higher-TMB subtype of the cancer.
The black indicates that the gene-set has no significant expression differences between the higher-TMB and the lower-TMB subtypes of the cancer.
The above note applies to all the other sheets.

## Sheet: immune checkpoint
higher-TMB (upper quartile) vs. lower-TMB (lower quartile)	higher-TMB (upper third) vs. lower-TMB (lower third)	higher-TMB (upper half) vs. lower-TMB (lower half)
Cancer_type	Cancer_type	Cancer_type
ACC	ACC	ACC
BLCA	BLCA	BLCA
BRCA	BRCA	BRCA
CESC	CESC	CESC
CHOL	CHOL	CHOL
COAD	COAD	COAD
DLBC	DLBC	DLBC
ESCA	ESCA	ESCA
GBM	GBM	GBM
HNSC	HNSC	HNSC
KICH	KICH	KICH
KIRC	KIRC	KIRC
KIRP	KIRP	KIRP
LAML	LAML	LAML
LGG	LGG	LGG
LIHC	LIHC	LIHC
LUAD	LUAD	LUAD
LUSC	LUSC	LUSC
OV	OV	OV
PAAD	PAAD	PAAD
PCPG	PCPG	PCPG
PRAD	PRAD	PRAD
READ	READ	READ
SARC	SARC	SARC
SKCM	SKCM	SKCM
STAD	STAD	STAD
TGCT	TGCT	TGCT
THCA	THCA	THCA
THYM	THYM	THYM
UCEC	UCEC	UCEC
UCS	UCS	UCS
UVM	UVM	UVM

## Sheet: immune cell infiltrate
higher-TMB (upper quartile) vs. lower-TMB (lower quartile)	higher-TMB (upper third) vs. lower-TMB (lower third)	higher-TMB (upper half) vs. lower-TMB (lower half)
Cancer_type	Cancer_type	Cancer_type
ACC	ACC	ACC
BLCA	BLCA	BLCA
BRCA	BRCA	BRCA
CESC	CESC	CESC
CHOL	CHOL	CHOL
COAD	COAD	COAD
DLBC	DLBC	DLBC
ESCA	ESCA	ESCA
GBM	GBM	GBM
HNSC	HNSC	HNSC
KICH	KICH	KICH
KIRC	KIRC	KIRC
KIRP	KIRP	KIRP
LAML	LAML	LAML
LGG	LGG	LGG
LIHC	LIHC	LIHC
LUAD	LUAD	LUAD
LUSC	LUSC	LUSC
OV	OV	OV
PAAD	PAAD	PAAD
PCPG	PCPG	PCPG
PRAD	PRAD	PRAD
READ	READ	READ
SARC	SARC	SARC
SKCM	SKCM	SKCM
STAD	STAD	STAD
TGCT	TGCT	TGCT
THCA	THCA	THCA
THYM	THYM	THYM
UCEC	UCEC	UCEC
UCS	UCS	UCS
UVM	UVM	UVM

## Sheet: TILs
higher-TMB (upper quartile) vs. lower-TMB (lower quartile)	higher-TMB (upper third) vs. lower-TMB (lower third)	higher-TMB (upper half) vs. lower-TMB (lower half)
Cancer_type	Cancer_type	Cancer_type
ACC	ACC	ACC
BLCA	BLCA	BLCA
BRCA	BRCA	BRCA
CESC	CESC	CESC
CHOL	CHOL	CHOL
COAD	COAD	COAD
DLBC	DLBC	DLBC
ESCA	ESCA	ESCA
GBM	GBM	GBM
HNSC	HNSC	HNSC
KICH	KICH	KICH
KIRC	KIRC	KIRC
KIRP	KIRP	KIRP
LAML	LAML	LAML
LGG	LGG	LGG
LIHC	LIHC	LIHC
LUAD	LUAD	LUAD
LUSC	LUSC	LUSC
OV	OV	OV
PAAD	PAAD	PAAD
PCPG	PCPG	PCPG
PRAD	PRAD	PRAD
READ	READ	READ
SARC	SARC	SARC
SKCM	SKCM	SKCM
STAD	STAD	STAD
TGCT	TGCT	TGCT
THCA	THCA	THCA
THYM	THYM	THYM
UCEC	UCEC	UCEC
UCS	UCS	UCS
UVM	UVM	UVM

## Sheet: CTA
higher-TMB (upper quartile) vs. lower-TMB (lower quartile)	higher-TMB (upper third) vs. lower-TMB (lower third)	higher-TMB (upper half) vs. lower-TMB (lower half)
Cancer_type	Cancer_type	Cancer_type
ACC	ACC	ACC
BLCA	BLCA	BLCA
BRCA	BRCA	BRCA
CESC	CESC	CESC
CHOL	CHOL	CHOL
COAD	COAD	COAD
DLBC	DLBC	DLBC
ESCA	ESCA	ESCA
GBM	GBM	GBM
HNSC	HNSC	HNSC
KICH	KICH	KICH
KIRC	KIRC	KIRC
KIRP	KIRP	KIRP
LAML	LAML	LAML
LGG	LGG	LGG
LIHC	LIHC	LIHC
LUAD	LUAD	LUAD
LUSC	LUSC	LUSC
OV	OV	OV
PAAD	PAAD	PAAD
PCPG	PCPG	PCPG
PRAD	PRAD	PRAD
READ	READ	READ
SARC	SARC	SARC
SKCM	SKCM	SKCM
STAD	STAD	STAD
TGCT	TGCT	TGCT
THCA	THCA	THCA
THYM	THYM	THYM
UCEC	UCEC	UCEC
UCS	UCS	UCS
UVM	UVM	UVM

## Sheet: HLA
higher-TMB (upper quartile) vs. lower-TMB (lower quartile)	higher-TMB (upper third) vs. lower-TMB (lower third)	higher-TMB (upper half) vs. lower-TMB (lower half)
Cancer_type	Cancer_type	Cancer_type
ACC	ACC	ACC
BLCA	BLCA	BLCA
BRCA	BRCA	BRCA
CESC	CESC	CESC
CHOL	CHOL	CHOL
COAD	COAD	COAD
DLBC	DLBC	DLBC
ESCA	ESCA	ESCA
GBM	GBM	GBM
HNSC	HNSC	HNSC
KICH	KICH	KICH
KIRC	KIRC	KIRC
KIRP	KIRP	KIRP
LAML	LAML	LAML
LGG	LGG	LGG
LIHC	LIHC	LIHC
LUAD	LUAD	LUAD
LUSC	LUSC	LUSC
OV	OV	OV
PAAD	PAAD	PAAD
PCPG	PCPG	PCPG
PRAD	PRAD	PRAD
READ	READ	READ
SARC	SARC	SARC
SKCM	SKCM	SKCM
STAD	STAD	STAD
TGCT	TGCT	TGCT
THCA	THCA	THCA
THYM	THYM	THYM
UCEC	UCEC	UCEC
UCS	UCS	UCS
UVM	UVM	UVM

## Sheet: CCR
higher-TMB (upper quartile) vs. lower-TMB (lower quartile)	higher-TMB (upper third) vs. lower-TMB (lower third)	higher-TMB (upper half) vs. lower-TMB (lower half)
Cancer_type	Cancer_type	Cancer_type
ACC	ACC	ACC
BLCA	BLCA	BLCA
BRCA	BRCA	BRCA
CESC	CESC	CESC
CHOL	CHOL	CHOL
COAD	COAD	COAD
DLBC	DLBC	DLBC
ESCA	ESCA	ESCA
GBM	GBM	GBM
HNSC	HNSC	HNSC
KICH	KICH	KICH
KIRC	KIRC	KIRC
KIRP	KIRP	KIRP
LAML	LAML	LAML
LGG	LGG	LGG
LIHC	LIHC	LIHC
LUAD	LUAD	LUAD
LUSC	LUSC	LUSC
OV	OV	OV
PAAD	PAAD	PAAD
PCPG	PCPG	PCPG
PRAD	PRAD	PRAD
READ	READ	READ
SARC	SARC	SARC
SKCM	SKCM	SKCM
STAD	STAD	STAD
TGCT	TGCT	TGCT
THCA	THCA	THCA
THYM	THYM	THYM
UCEC	UCEC	UCEC
UCS	UCS	UCS
UVM	UVM	UVM

## Sheet: Pro-inflammatory
higher-TMB (upper quartile) vs. lower-TMB (lower quartile)	higher-TMB (upper third) vs. lower-TMB (lower third)	higher-TMB (upper half) vs. lower-TMB (lower half)
Cancer_type	Cancer_type	Cancer_type
ACC	ACC	ACC
BLCA	BLCA	BLCA
BRCA	BRCA	BRCA
CESC	CESC	CESC
CHOL	CHOL	CHOL
COAD	COAD	COAD
DLBC	DLBC	DLBC
ESCA	ESCA	ESCA
GBM	GBM	GBM
HNSC	HNSC	HNSC
KICH	KICH	KICH
KIRC	KIRC	KIRC
KIRP	KIRP	KIRP
LAML	LAML	LAML
LGG	LGG	LGG
LIHC	LIHC	LIHC
LUAD	LUAD	LUAD
LUSC	LUSC	LUSC
OV	OV	OV
PAAD	PAAD	PAAD
PCPG	PCPG	PCPG
PRAD	PRAD	PRAD
READ	READ	READ
SARC	SARC	SARC
SKCM	SKCM	SKCM
STAD	STAD	STAD
TGCT	TGCT	TGCT
THCA	THCA	THCA
THYM	THYM	THYM
UCEC	UCEC	UCEC
UCS	UCS	UCS
UVM	UVM	UVM
